# Supplementary material for: Exploring the synthetic potency of the first furanothioglycoligase through original remote activation
Source: Royal Society of Chemistry journal article supplement (doi:10.1039/c1ob06227a), 2011-01-01

## SUPPLEMENTARY INFORMATION

**Title** Exploring the synthetic potency of the first furanothioglycoligase through original remote activation.

**Authors** Mélanie Almendros, Dantcho Danalev, Marc François-Heude, Pascal Loyer, Laurent Legentil, Caroline Nugier-Chauvin, Richard Daniellou\* and Vincent Ferrières\*

### Table of contents

|            |                                           |            |                                           |
|------------|-------------------------------------------|------------|-------------------------------------------|
| <b>S1</b>  | Title, Authors, Table of contents         | <b>S13</b> | <sup>13</sup> C NMR spectrum of <b>11</b> |
| <b>S3</b>  | <sup>1</sup> H NMR spectrum of <b>7a</b>  | <b>S14</b> | <sup>1</sup> H NMR spectrum of <b>12</b>  |
| <b>S4</b>  | <sup>13</sup> C NMR spectrum of <b>7a</b> | <b>S15</b> | <sup>13</sup> C NMR spectrum of <b>12</b> |
| <b>S5</b>  | <sup>1</sup> H NMR spectrum of <b>7b</b>  | <b>S16</b> | <sup>1</sup> H NMR spectrum of <b>13</b>  |
| <b>S6</b>  | <sup>13</sup> C NMR spectrum of <b>7b</b> | <b>S17</b> | <sup>13</sup> C NMR spectrum of <b>13</b> |
| <b>S7</b>  | <sup>1</sup> H NMR spectrum of <b>7c</b>  | <b>S18</b> | <sup>1</sup> H NMR spectrum of <b>14</b>  |
| <b>S8</b>  | <sup>13</sup> C NMR spectrum of <b>7c</b> | <b>S19</b> | <sup>13</sup> C NMR spectrum of <b>14</b> |
| <b>S9</b>  | <sup>1</sup> H NMR spectrum of <b>10</b>  | <b>S20</b> | <sup>1</sup> H NMR spectrum of <b>15</b>  |
| <b>S10</b> | COSY spectrum of <b>10</b>                | <b>S21</b> | <sup>13</sup> C NMR spectrum of <b>15</b> |
| <b>S11</b> | HSQC spectrum of <b>10</b>                | <b>S22</b> | COSY spectrum of <b>15</b>                |
| <b>S12</b> | <sup>1</sup> H NMR spectrum of <b>11</b>  | <b>S23</b> | HSQC spectrum of <b>15</b>                |

|            |                                           |
|------------|-------------------------------------------|
| <b>S24</b> | HMQC spectrum of <b>15</b>                |
| <b>S25</b> | $^1\text{H}$ NMR spectrum of <b>16</b>    |
| <b>S26</b> | $^{13}\text{C}$ NMR spectrum of <b>16</b> |
| <b>S27</b> | $^1\text{H}$ NMR spectrum of <b>17</b>    |
| <b>S28</b> | $^{13}\text{C}$ NMR spectrum of <b>17</b> |
| <b>S29</b> | $^1\text{H}$ NMR spectrum of <b>18</b>    |
| <b>S30</b> | $^{13}\text{C}$ NMR spectrum of <b>18</b> |
| <b>S30</b> | $^1\text{H}$ NMR spectrum of <b>19</b>    |
| <b>S31</b> | COSY spectrum of <b>19</b>                |
| <b>S32</b> | HSQC spectrum of <b>19</b>                |
| <b>S33</b> | STD NMR Spectra of <b>10</b>              |
| <b>S34</b> | STD NMR Spectra of <b>15</b>              |

7a

proton MeOD {C:\spectres} passeur 38

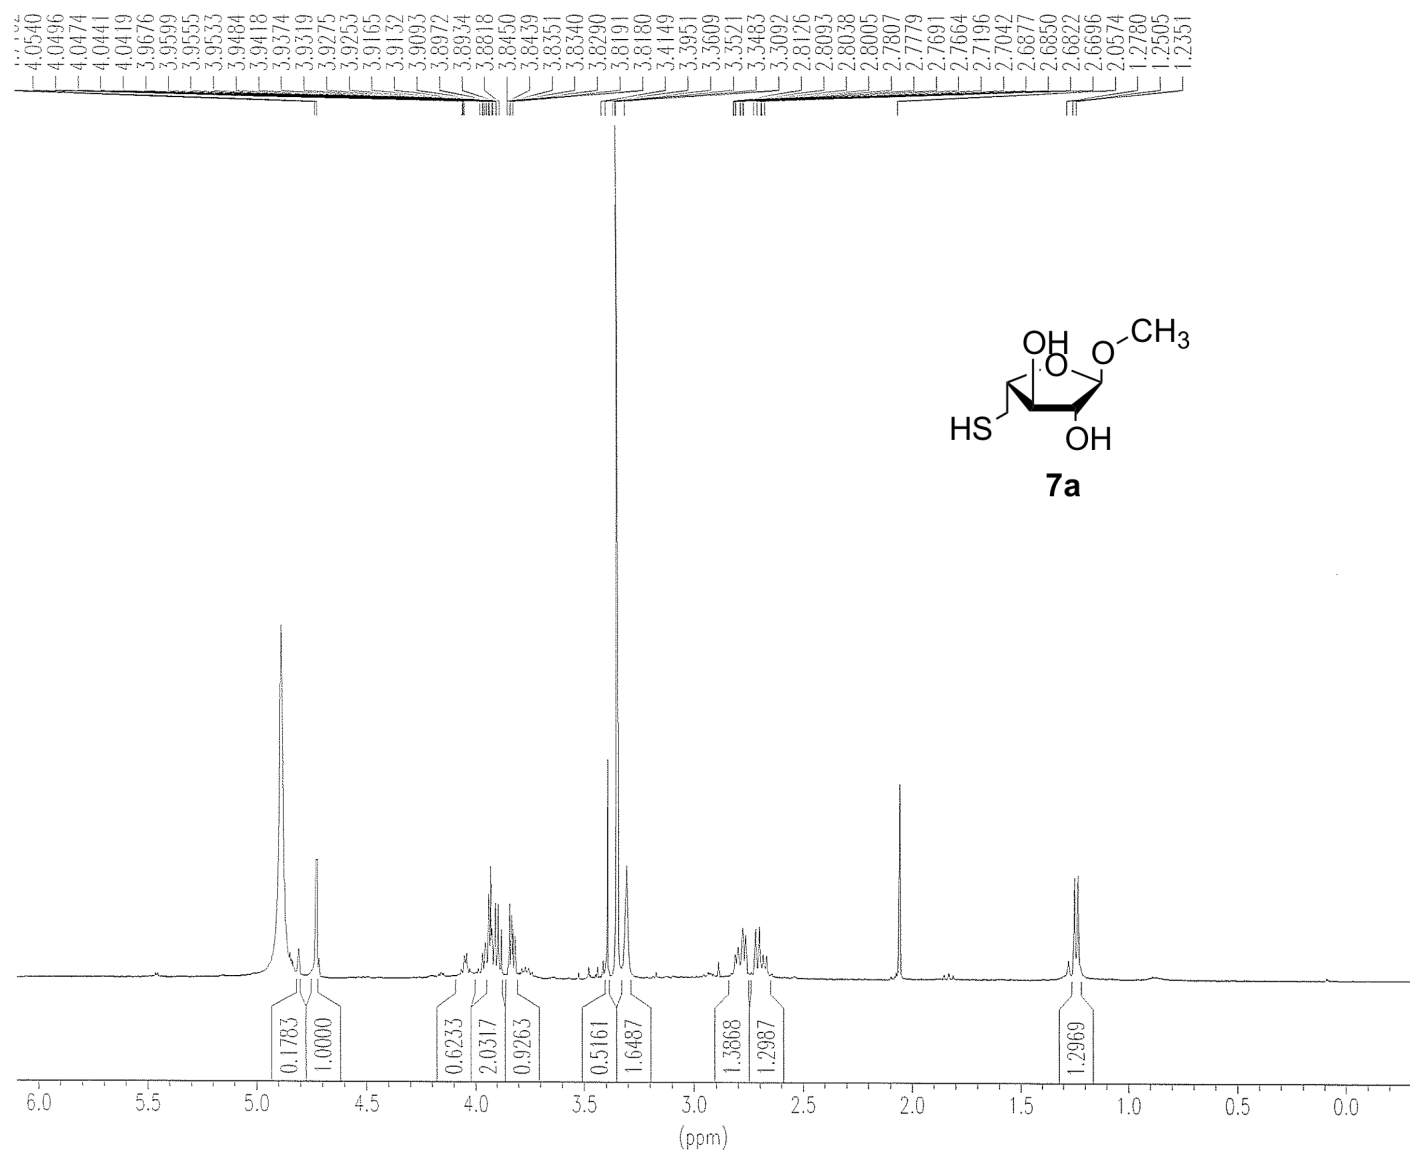

\*\*\* Current Data Parameters \*\*\*

NAME : e-ma120b  
EXPNO : 10  
PROCNO : 1

\*\*\* Acquisition Parameters \*\*\*

CNST[31] : 1.0000000  
CNST[63] : 1.0000000  
DATEt : 00:37:37  
DATED : Mar 04 2008  
NS : 8  
NUCLEUS : off  
SOLVENT : MeOD  
SW : 18.0229 ppm  
TD : 65536  
TE : 293.9 K

\*\*\* 1D NMR Plot Parameters \*\*\*

SR : 2.21 Hz  
ppmcm : 0.31  
Hzcm : 125.35  
AQtime : 4.5438290 sec  
NUCLEUS : off  
SOLVENT : ?

7a

A4-Jmod256 MeOD {C:\spectres} passeur 38

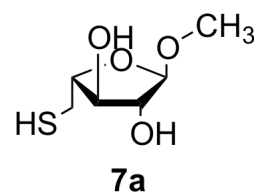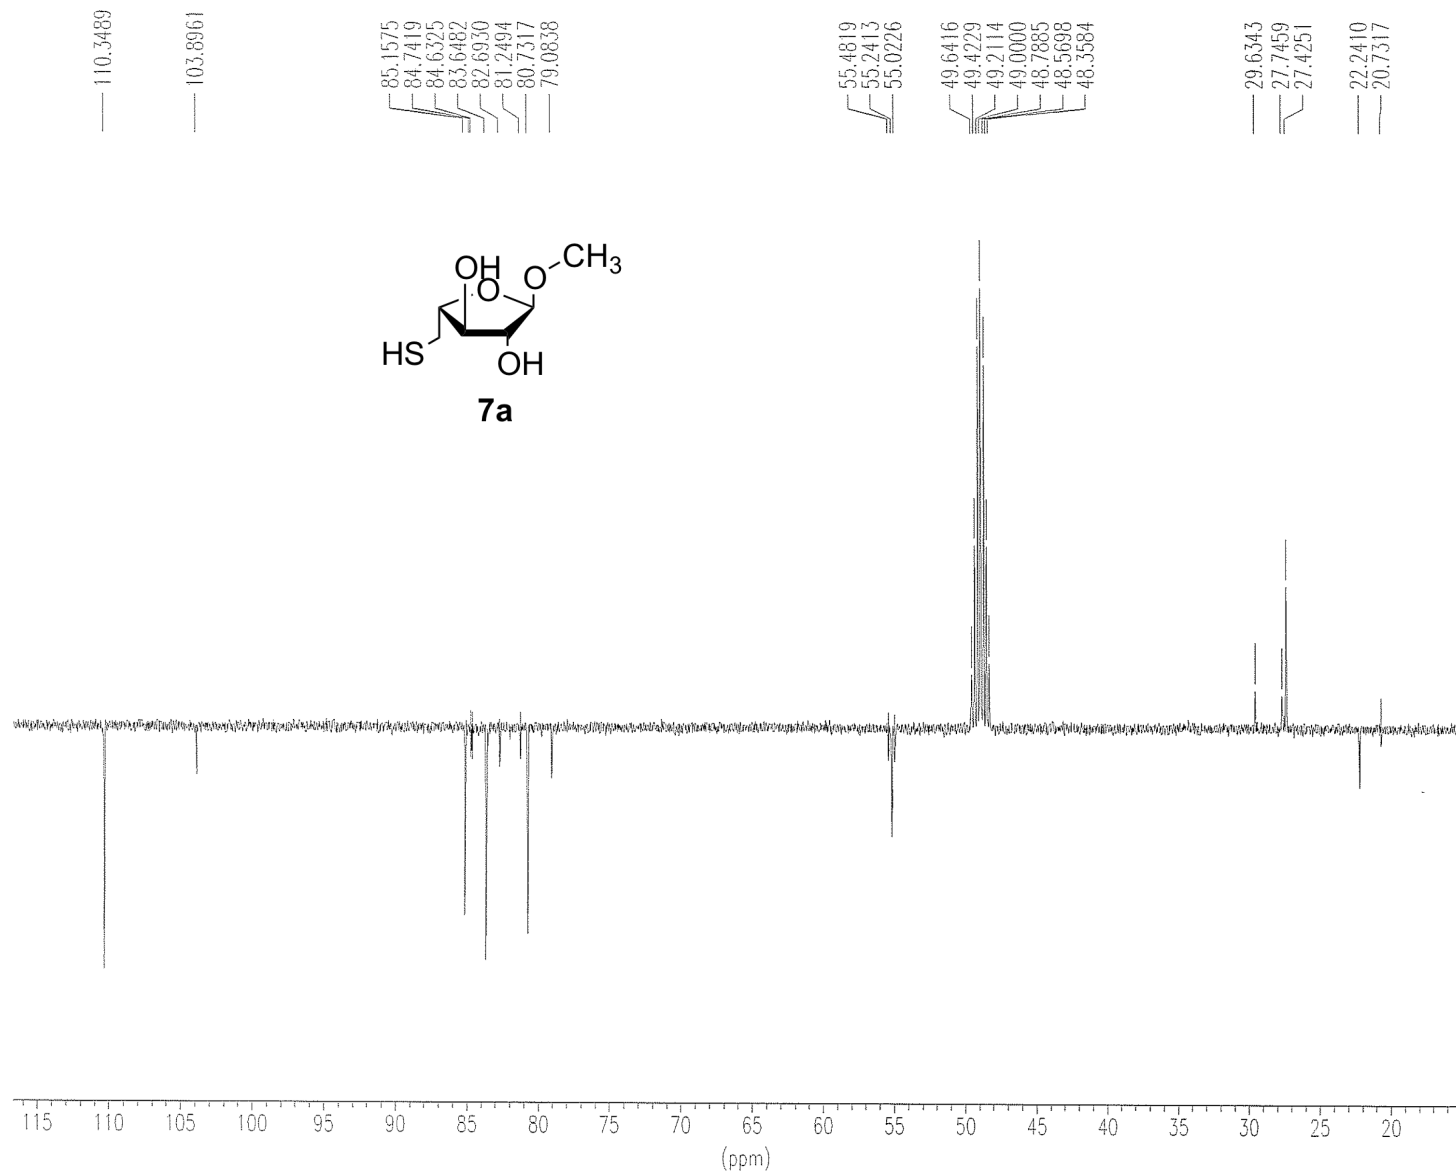

\*\*\* Current Data Parameters \*\*\*

NAME : e-ma120b

EXPNO : 13

PROCNO : 1

\*\*\* Acquisition Parameters \*\*\*

CNST[31] : 1.0000000

CNST[63] : 1.0000000

DATEt : 01:42:17

DATEd : Mar 04 2008

NS : 256

NUCLEUS : off

SOLVENT : MeOD

SW : 238.8967 ppm

TD : 65536

TE : 295.0 K

\*\*\* 1D NMR Plot Parameters \*\*\*

SR : -138.63 Hz

ppmcm : 4.81

Hrcm : 484.31

AQtime : 1.3631490 sec

NUCLEUS : off

SOLVENT : ?



26

A4-proton MeOD {C:\spectres} passeur 26

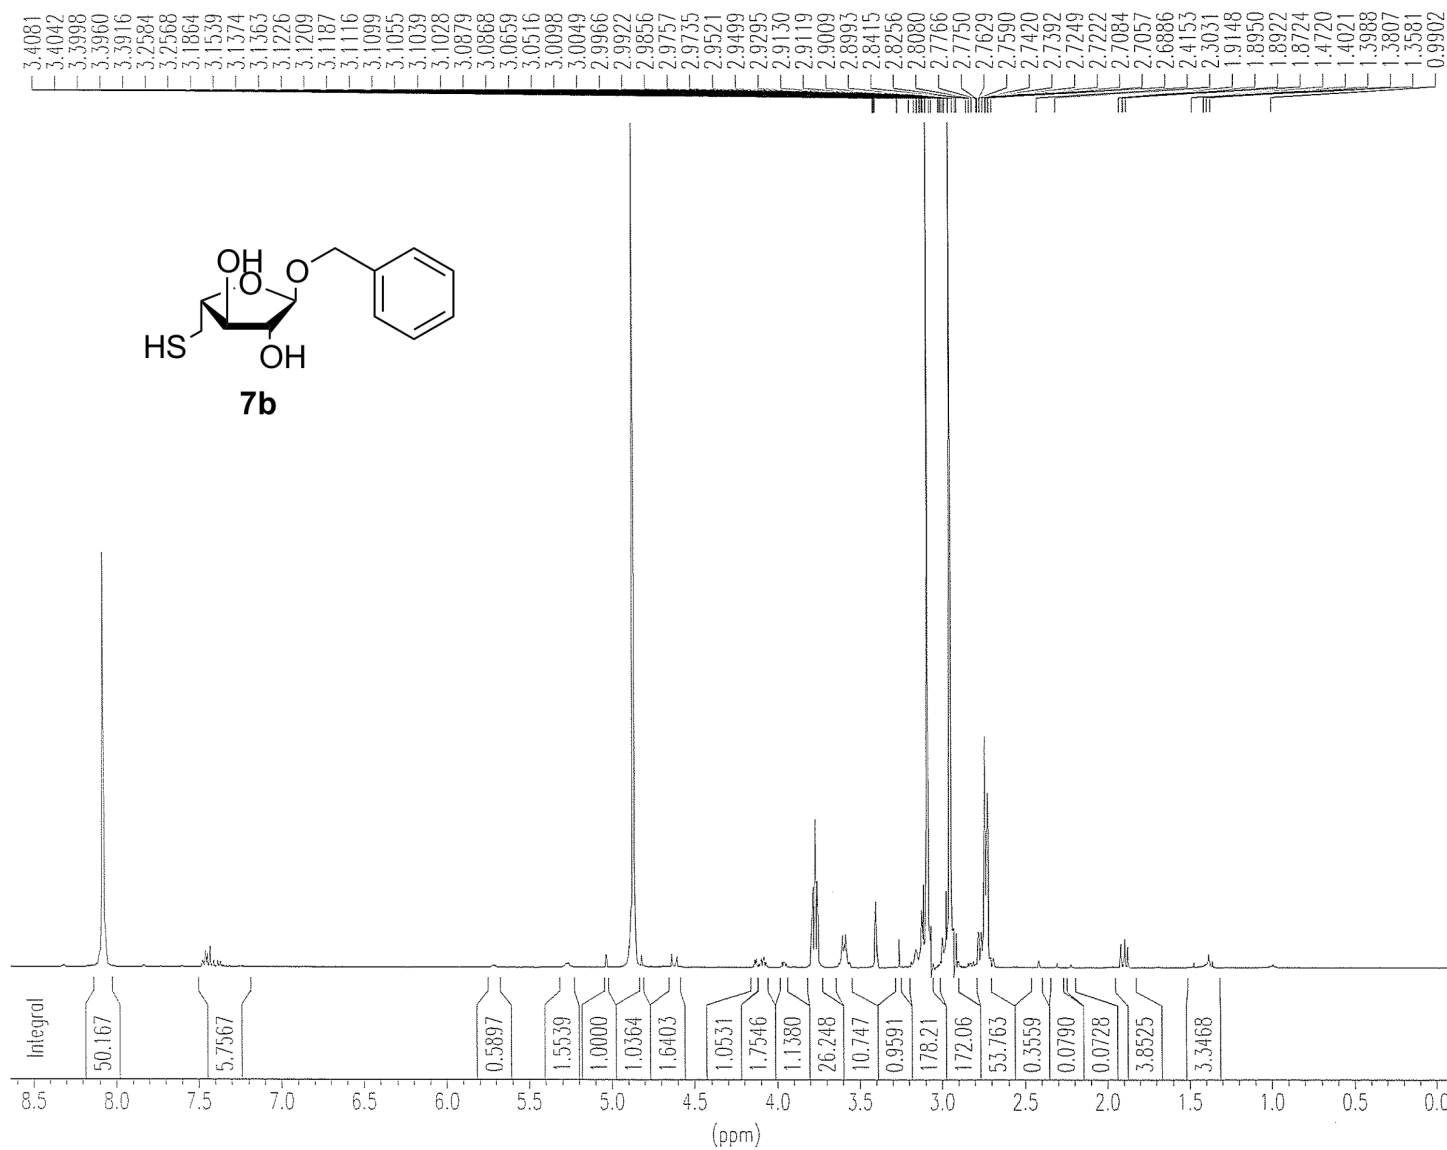

\*\*\* Current Data Parameters \*\*\*

NAME : e-ma82p

EXPNO : 10

PROCNO : 1

\*\*\* Acquisition Parameters \*\*\*

CNST[31] : 1.0000000

CNST[63] : 1.0000000

DATEt : 01:14:14

DATEd : Nov 22 2007

NS : 8

NUCLEUS : off

SOLVENT : MeOD

SW : 18.0229 ppm

TD : 65536

\*\*\* 1D NMR Plot Parameters \*\*\*

SR : -32.93 Hz

ppmcm : 0.41

HZcm : 165.91

AQtime : 4.5438290 sec

NUCLEUS : off

SOLVENT : ?

A4-Jmod1024 MeOD {C:\spectres} passeur 26

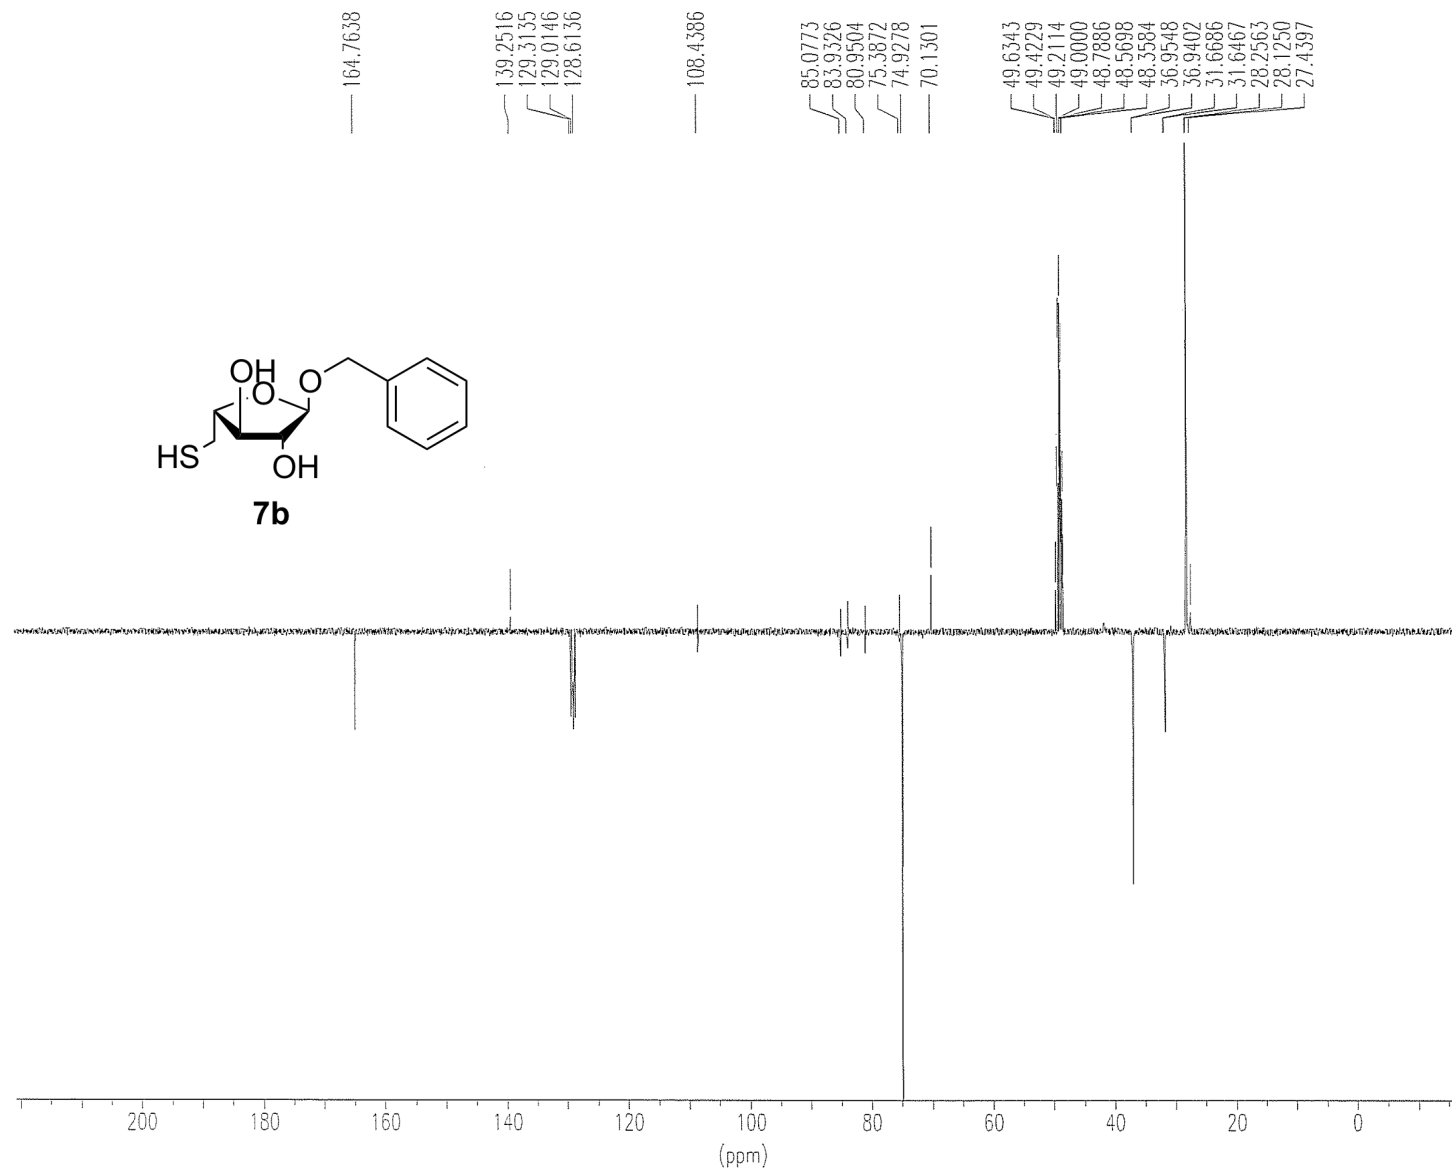

\*\*\* Current Data Parameters \*\*\*

NAME : e-ma82p

EXPNO : 11

PROCNO : 1

\*\*\* Acquisition Parameters \*\*\*

CNST[31] : 1.0000000

CNST[63] : 1.0000000

DATEt : 02:14:07

DATED : Nov 22 2007

NS : 1024

NUCLEUS : off

SOLVENT : MeOD

SW : 238.8967 ppm

TD : 65536

\*\*\* 1D NMR Plot Parameters \*\*\*

SR : -132.03 Hz

ppmcm : 11.27

Hzcm : 1133.89

AQtime : 1.3631490 sec

NUCLEUS : off

SOLVENT : ?

S 7

7c

A4—proton MeOD {C:\spectres} passeur 32

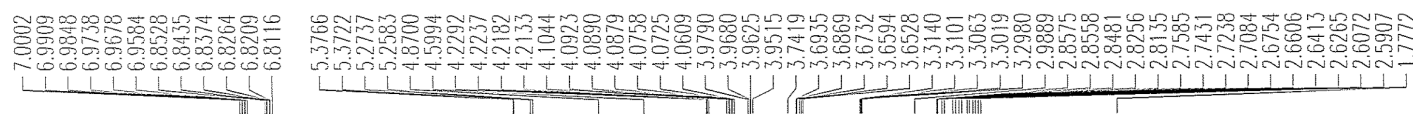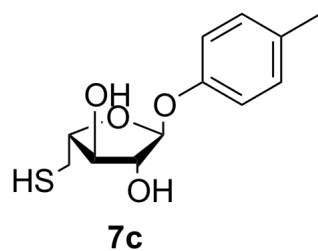

\*\*\* Current Data Parameters \*\*\*

NAME : e-ma83p

EXPNO : 10

PROCNO : 1

\*\*\* Acquisition Parameters \*\*\*

CNST[31] : 1.0000000

CNST[63] : 1.0000000

DATEt : 02:03:24

DATEd : Nov 20 2007

NS : 8

NUCLEUS : off

SOLVENT : MeOD

SW : 18.0229 ppm

TD : 65536

\*\*\* 1D NMR Plot Parameters \*\*\*

SR : 4.71 Hz

ppmcm : 0.41

Hzcm : 163.64

AQtime : 4.5438290 sec

NUCLEUS : off

SOLVENT : ?

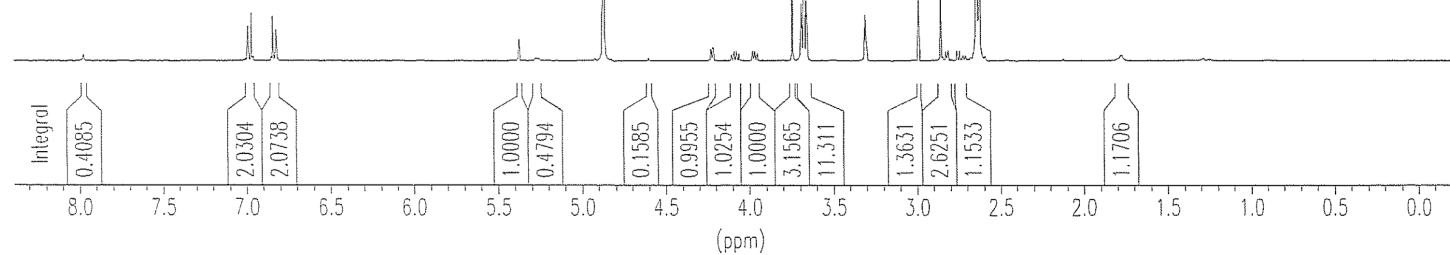

7c

A4-Jmod1024 MeOD {C:\spectres} passeur 32

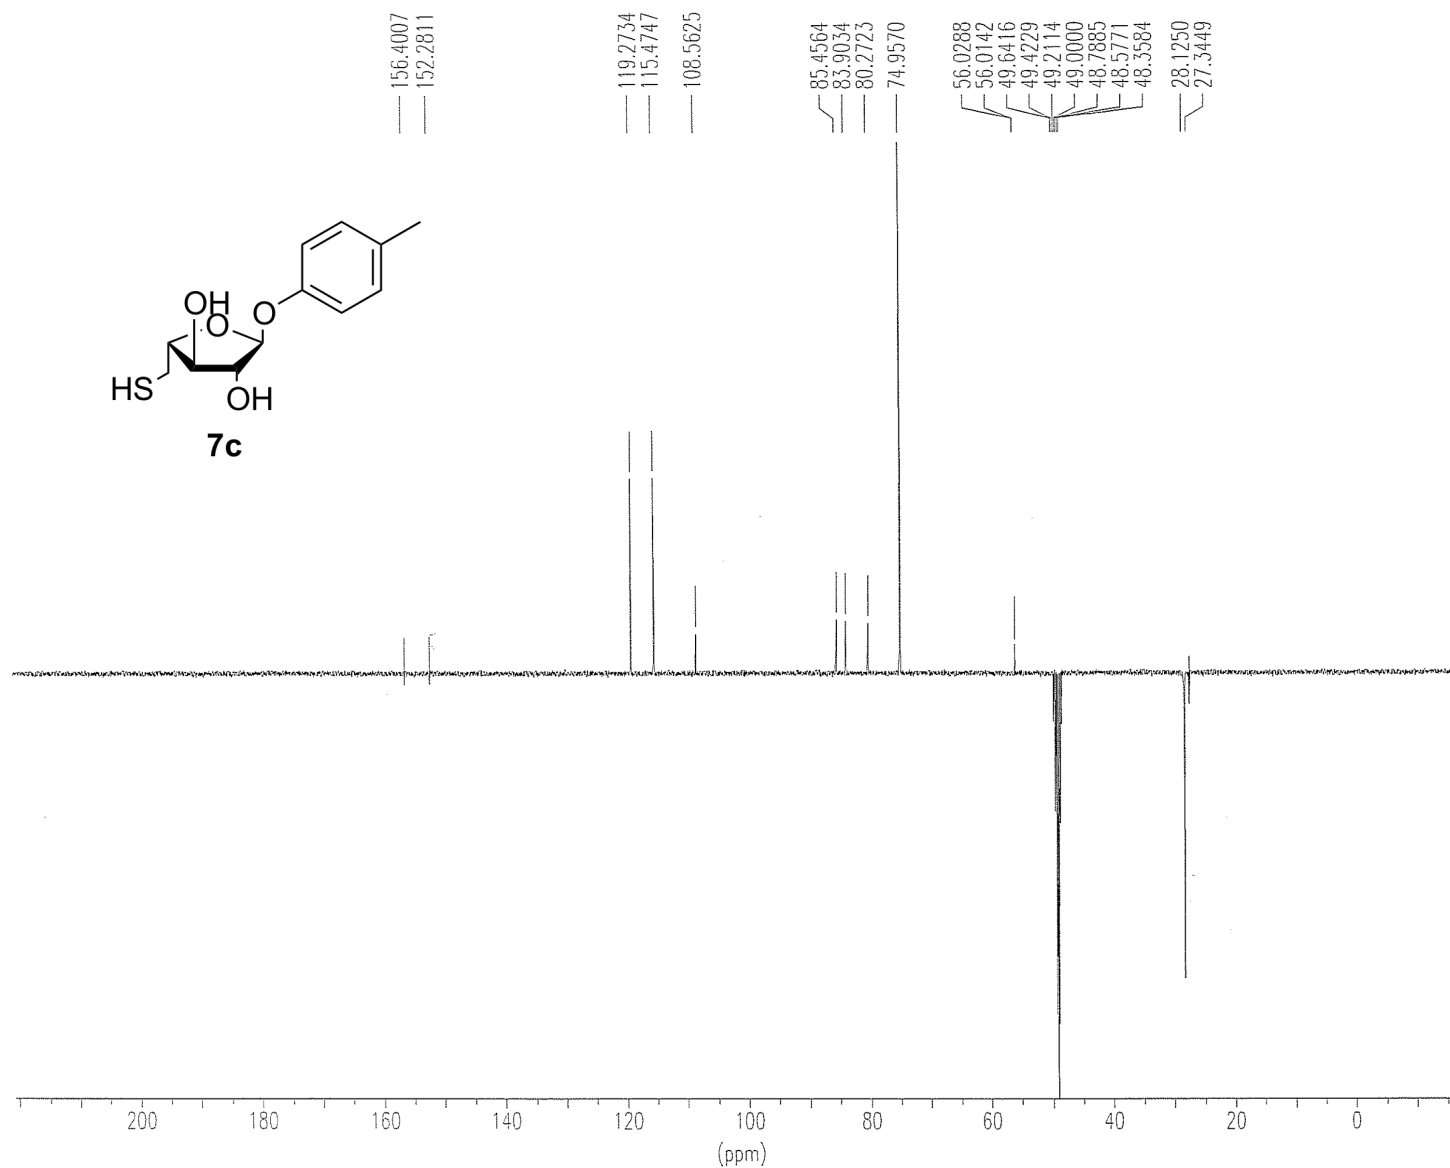

\*\*\* Current Data Parameters \*\*\*

NAME : e-ma83p

EXPNO : 11

PROCNO : 1

\*\*\* Acquisition Parameters \*\*\*

CNST[31] : 1.0000000

CNST[63] : 1.0000000

DATEt : 02:55:37

DATEd : Nov 20 2007

NS : 889

NUCLEUS : off

SOLVENT : MeOD

SW : 238.8967 ppm

TD : 65536

\*\*\* 1D NMR Plot Parameters \*\*\*

SR : -137.17 Hz

ppmcm : 11.27

Hzcm : 1133.89

AQtime : 1.3631490 sec

NUCLEUS : off

SOLVENT : ?

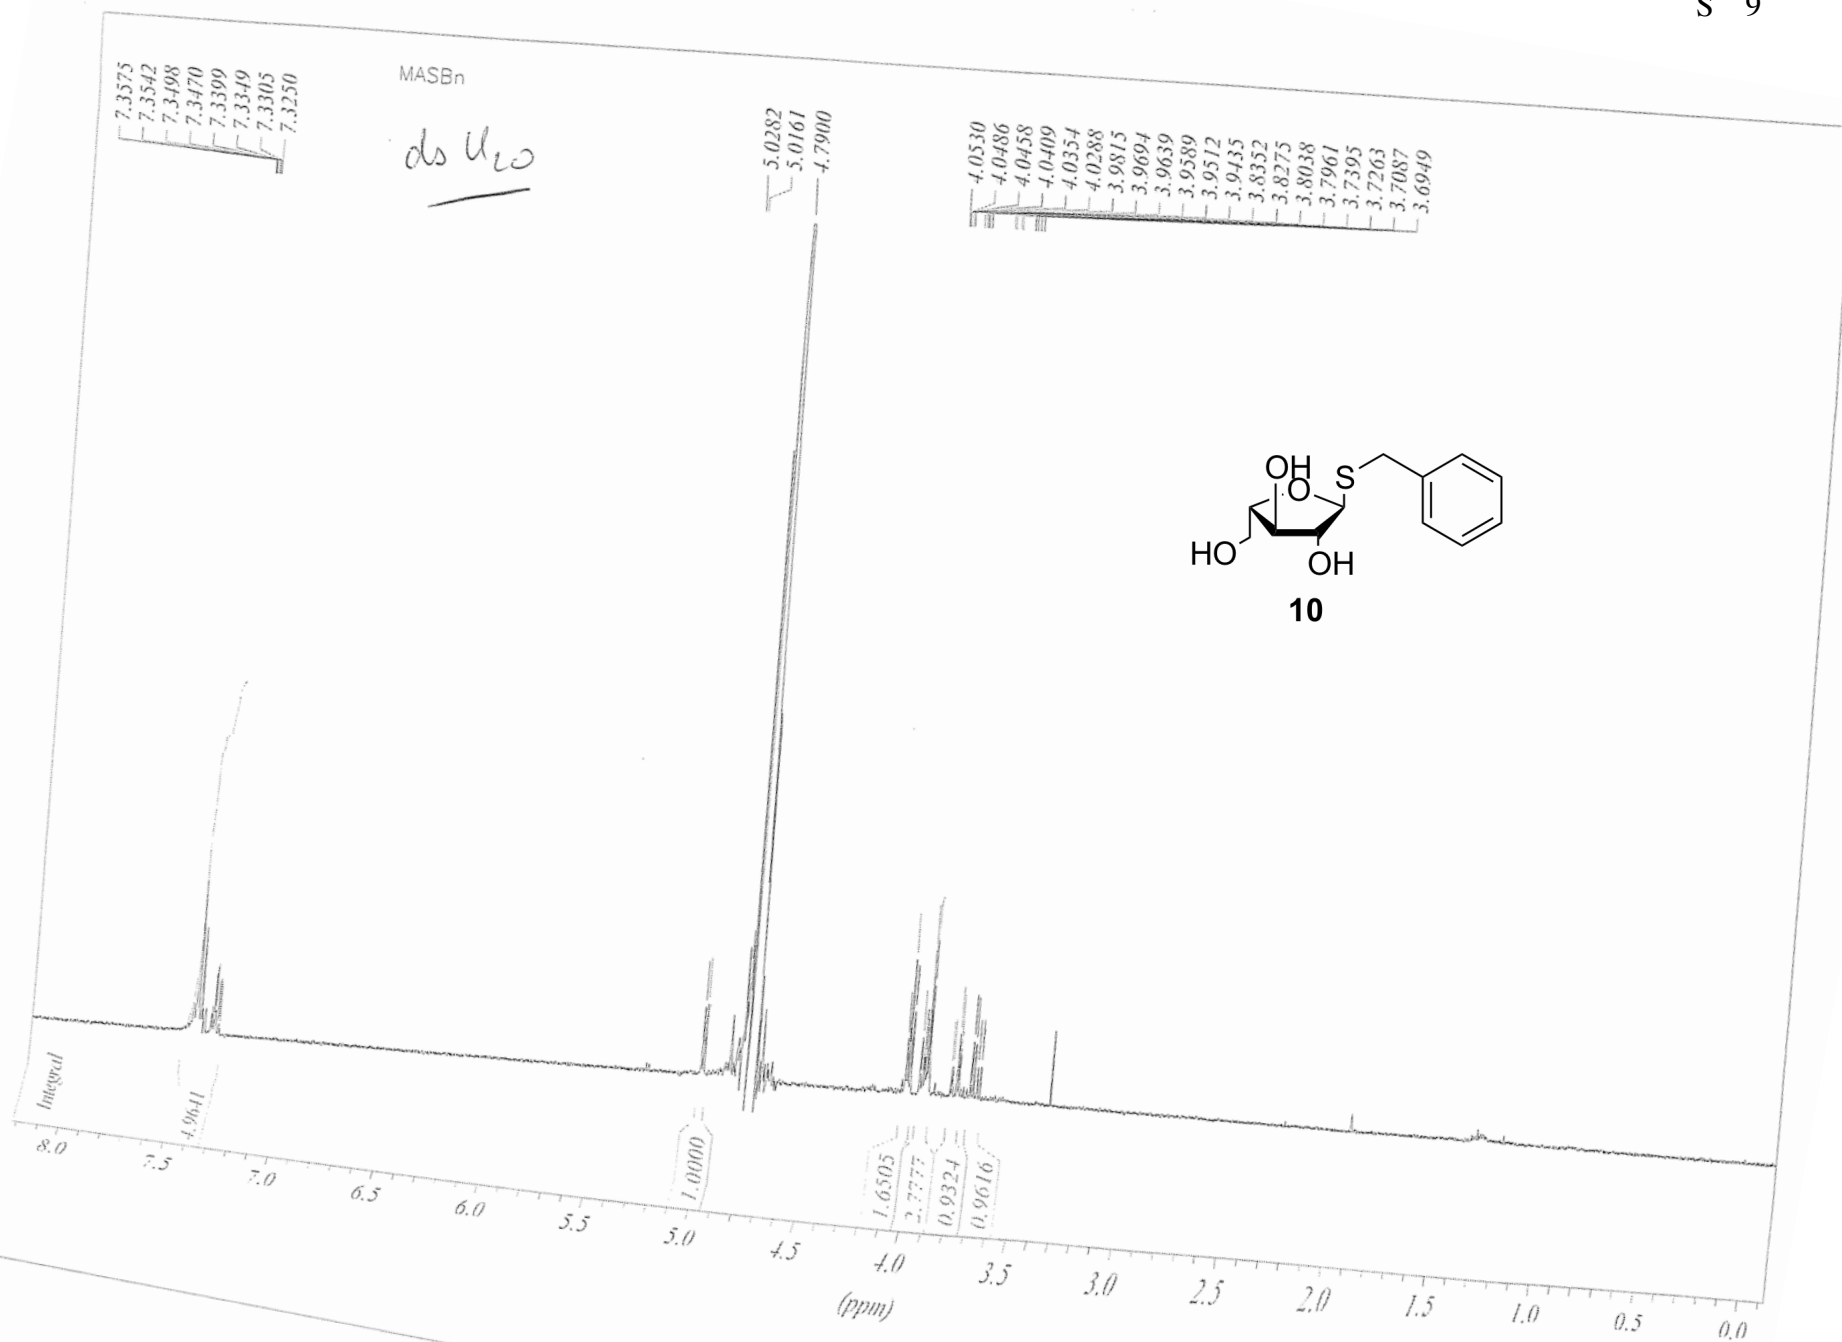

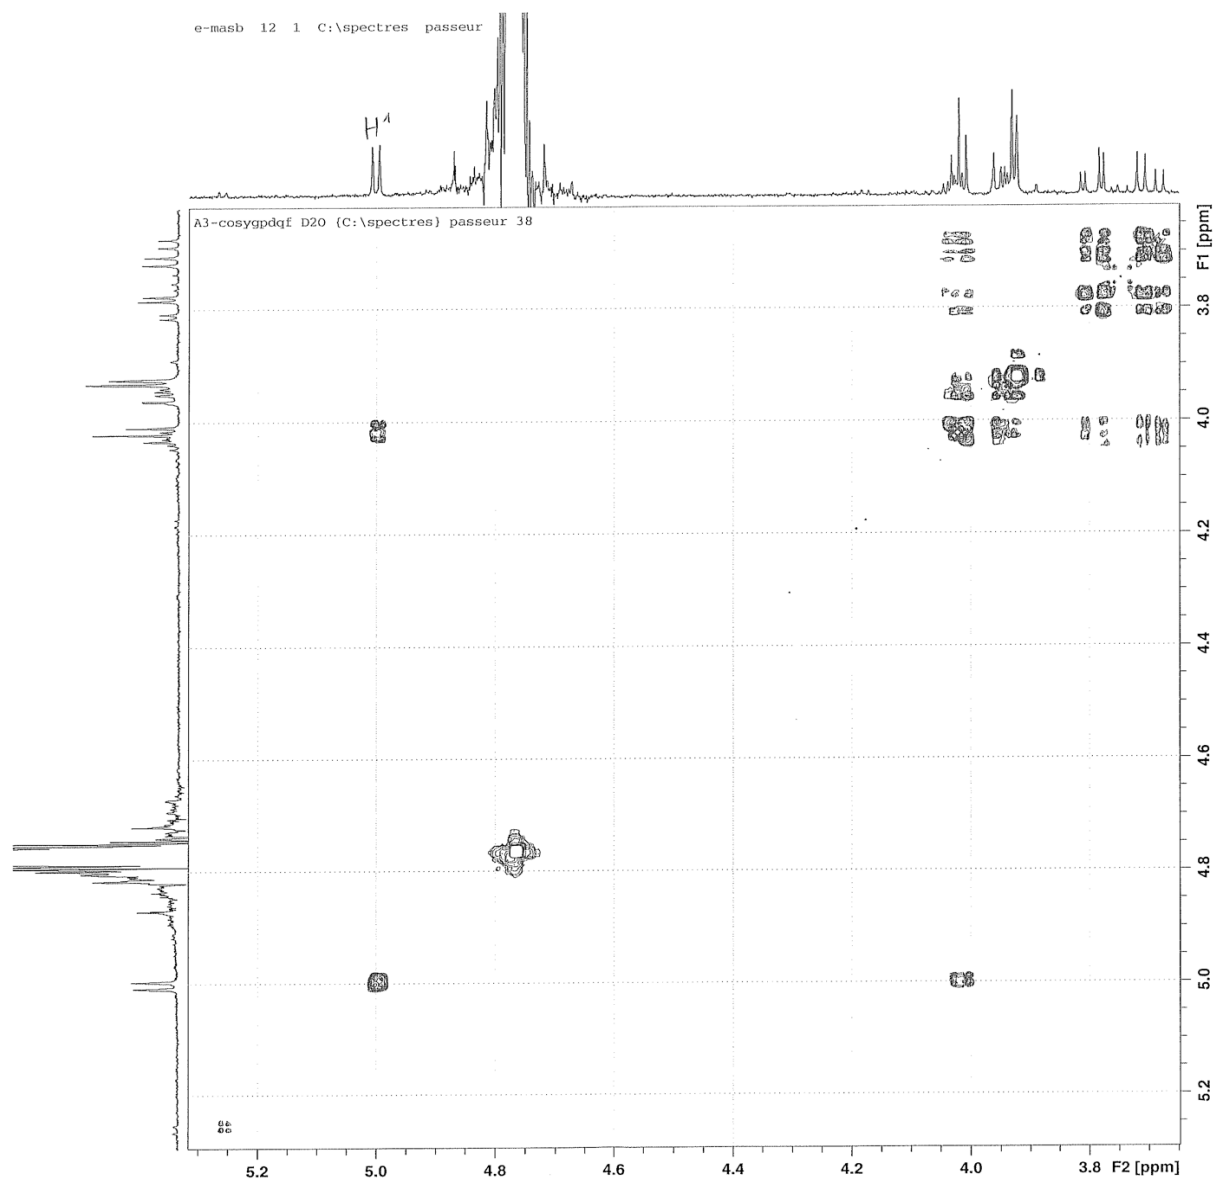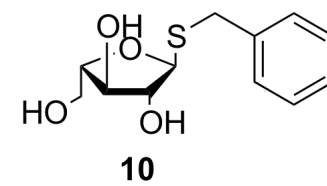

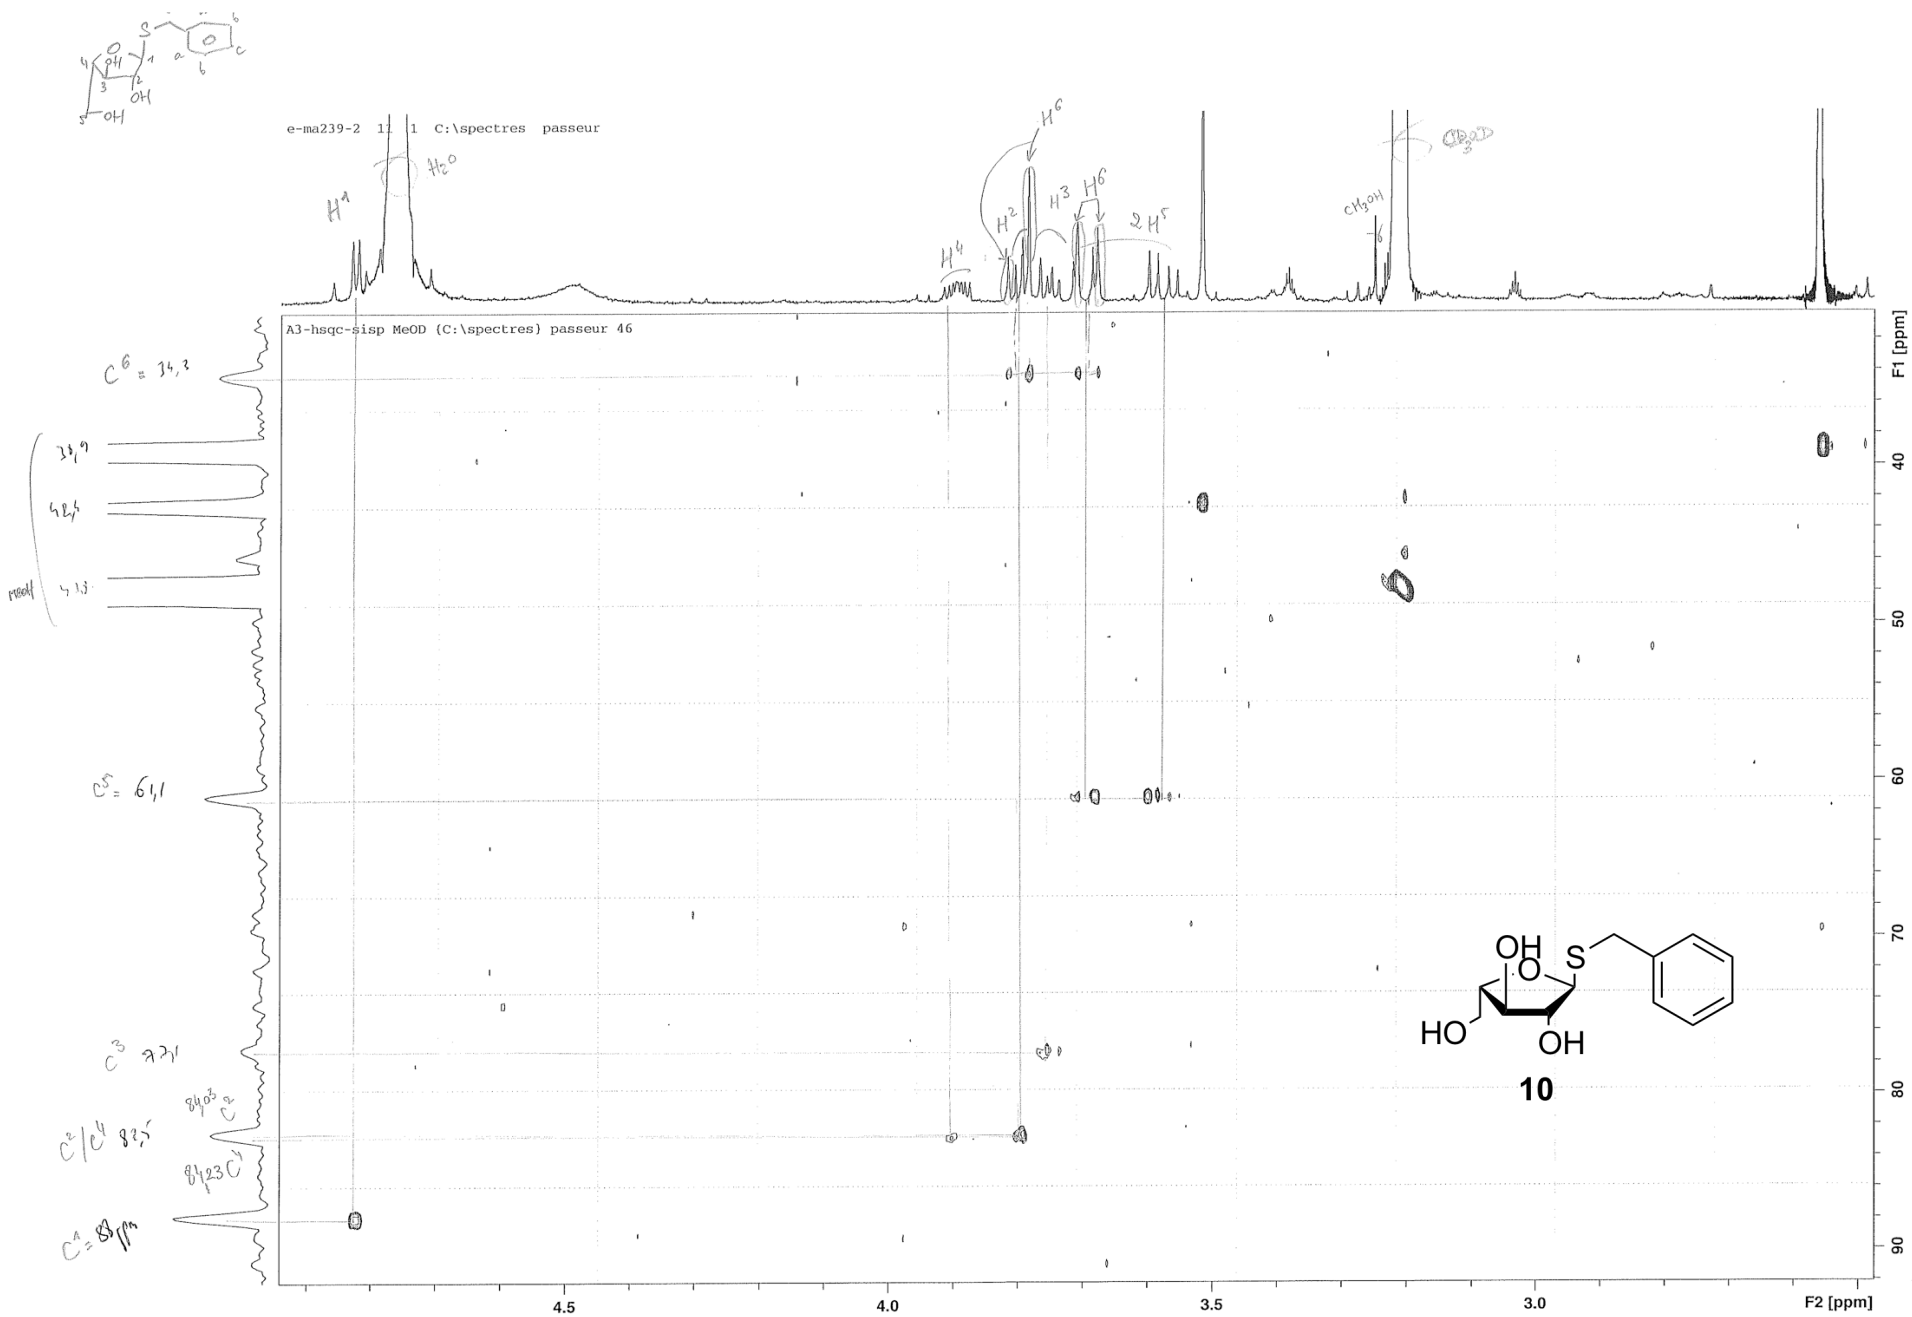

WATER MeOD {C:\spectres\ passeur 51

7.3074  
7.3023  
7.2910  
7.2860  
7.2798  
6.6764  
6.6688  
6.6638  
6.6525  
6.6475  
6.6413

4.9942  
4.9816  
4.8700

3.9367  
3.9242  
3.9116  
3.8928  
3.8803  
3.8727  
3.8702  
3.8652  
3.8564  
3.8464  
3.7724  
3.7661  
3.7423  
3.7360  
3.6382  
3.6269  
3.6080  
3.5968  
3.5283  
3.5245  
3.5208  
3.3158  
3.3120

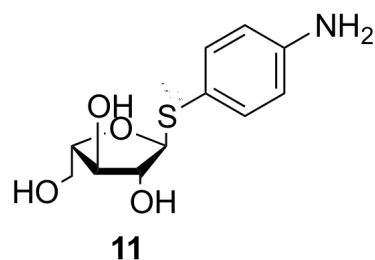

\*\*\* Current Data Parameters \*\*\*

NAME : e-mo284.2

EXPNO : 11

PROCNO : 1

\*\*\* Acquisition Parameters \*\*\*

CNST[31] : 1.0000000

CNST[63] : 1.0000000

DATEt : 02:53:49

DATEd : Jun 09 2009

NS : 32

NUCLEUS : off

SOLVENT : MeOD

SW : 20.5524 ppm

TD : 32768

TE : 297.0 K

\*\*\* 1D NMR Plot Parameters \*\*\*

SR : -0.94 Hz

ppmcm : 0.40

Hzcm : 159.17

AQtime : 1.9922940 sec

NUCLEUS : off

SOLVENT : ?

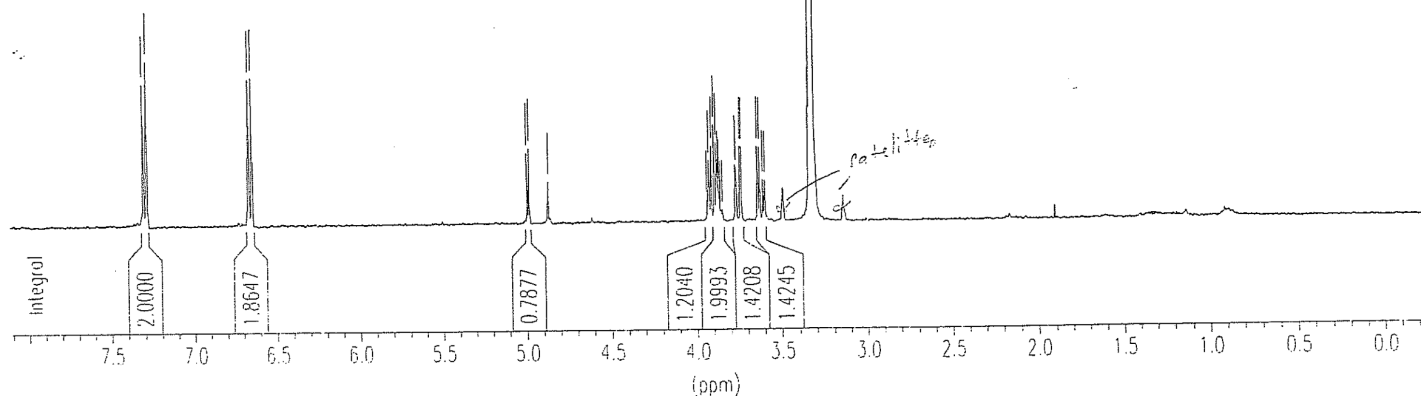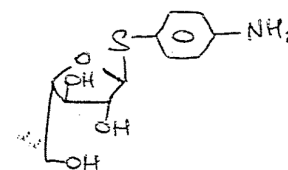



A4-Jmod1024 MeOD {C:\spectres\ passeur 18

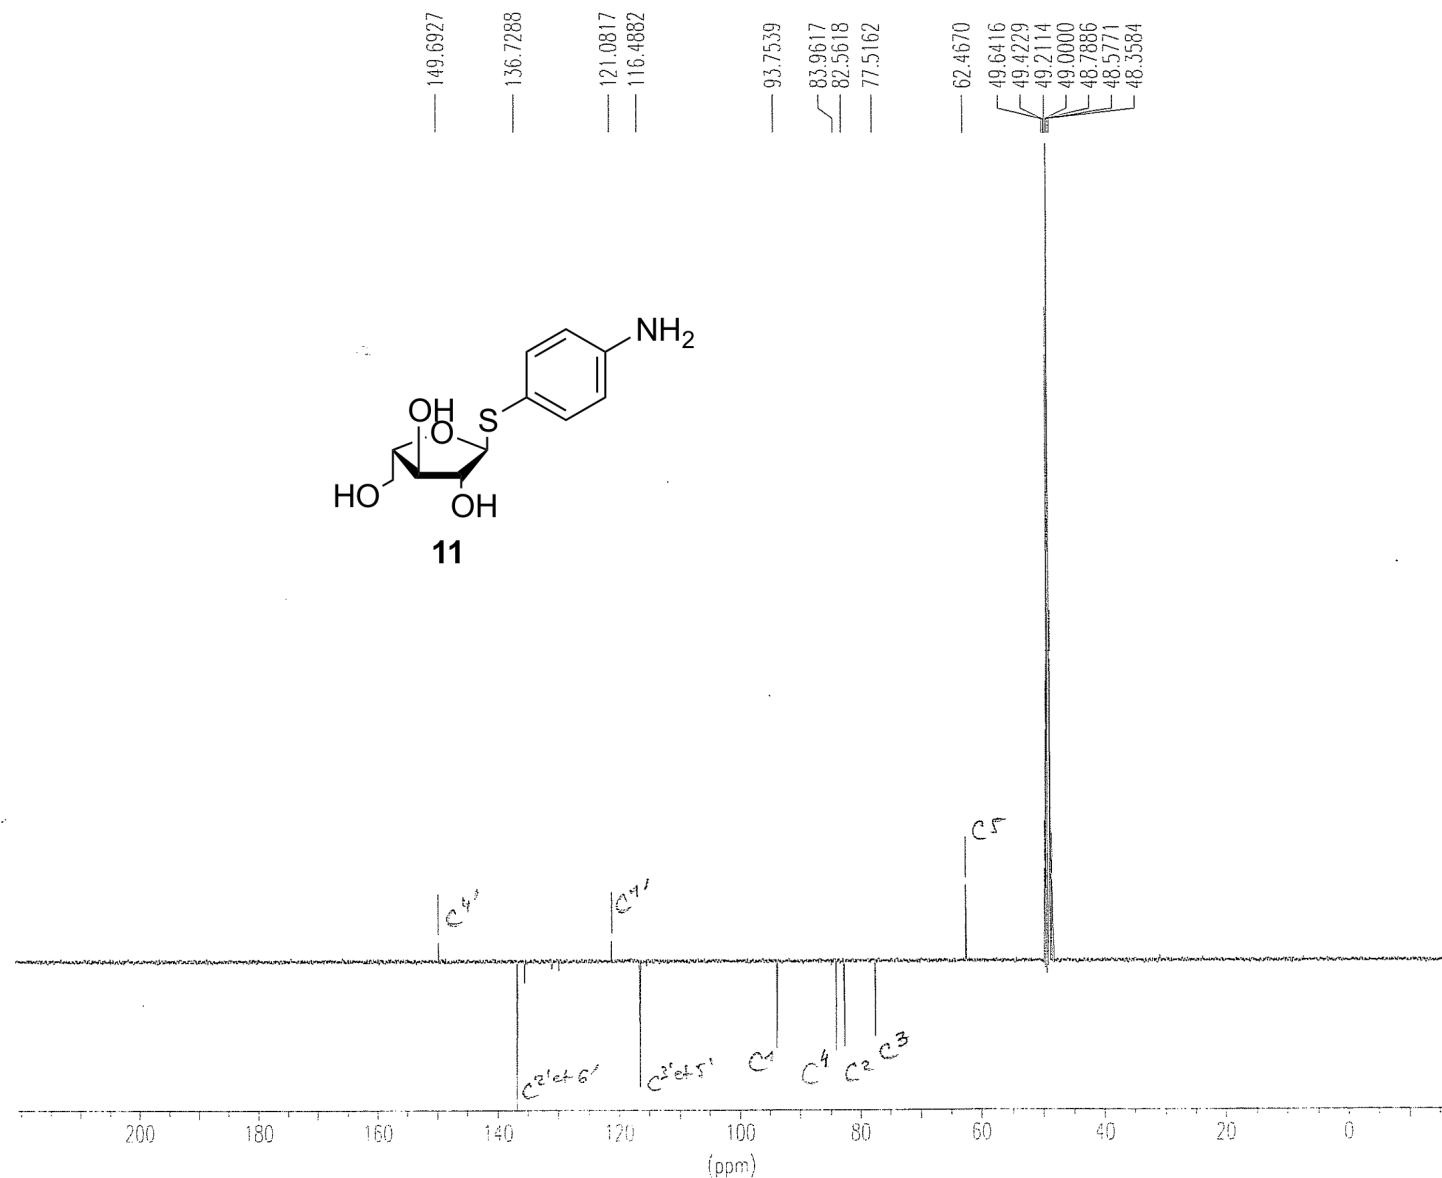

\*\*\* Current Data Parameters \*\*\*

NAME : e-ma290

EXPNO : 11

PROCNO : 1

\*\*\* Acquisition Parameters \*\*\*

CNST[31] : 1.0000000

CNST[63] : 1.0000000

DATEt : 14:32:05

DATED : Jun 13 2009

NS : 3072

NUCLEUS : off

SOLVENT : MeOD

SW : 238.8967 ppm

TD : 65536

TE : 297.0 K

\*\*\* 1D NMR Plot Parameters \*\*\*

SR : -142.30 Hz

ppmcm : 11.27

Hzcm : 1133.89

AQtime : 1.3631490 sec

NUCLEUS : off

SOLVENT : ?

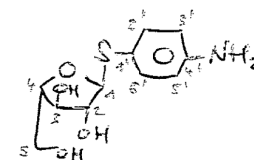

A4-proton32 MeOD {C:\spectres} passeur 15

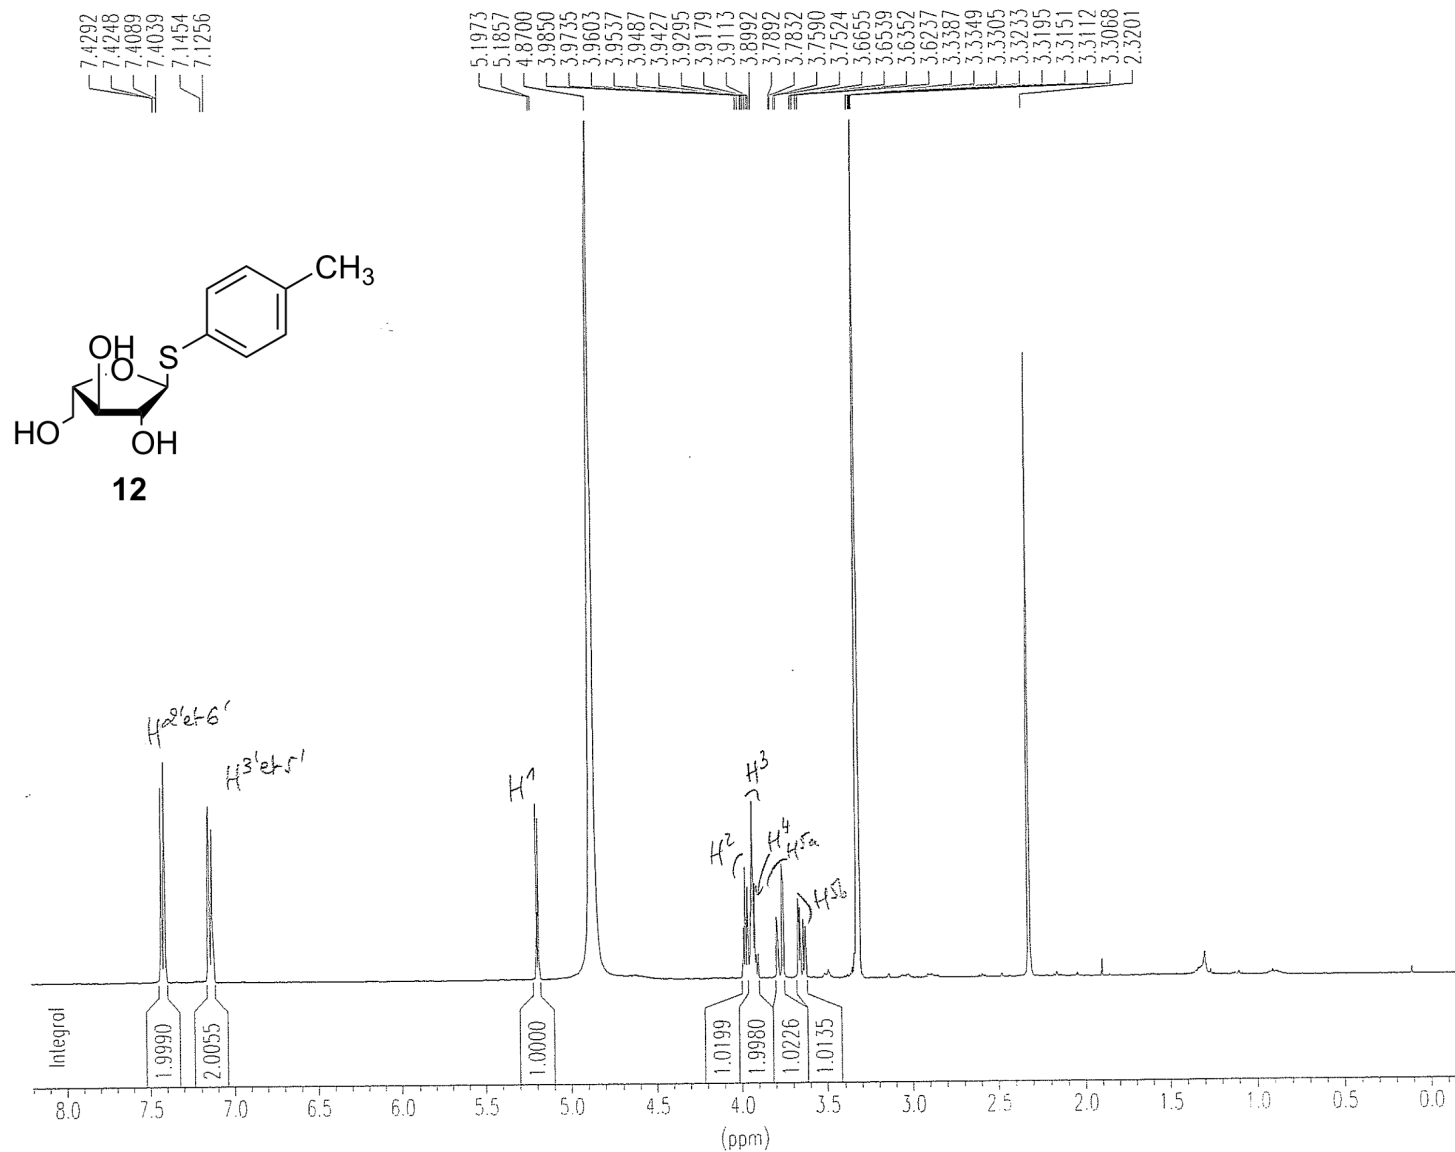

\*\*\* Current Data Parameters \*\*\*

NAME : e-ma275

EXPNO : 10

PROCNO : 1

\*\*\* Acquisition Parameters \*\*\*

CNST[31] : 1.0000000

CNST[63] : 1.0000000

DATEt : 12:42:13

DATEd : May 05 2009

NS : 32

NUCLEUS : off

SOLVENT : MeOD

SW : 18.0229 ppm

TD : 65536

TE : 297.0 K

\*\*\* 1D NMR Plot Parameters \*\*\*

SR : 0.97 Hz

ppmcm : 0.40

Hzcm : 159.47

AQtime : 4.5438290 sec

NUCLEUS : off

SOLVENT : ?

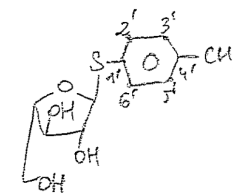

A4-Jmod1024 MeOD {C:\spectres\ passeur 14

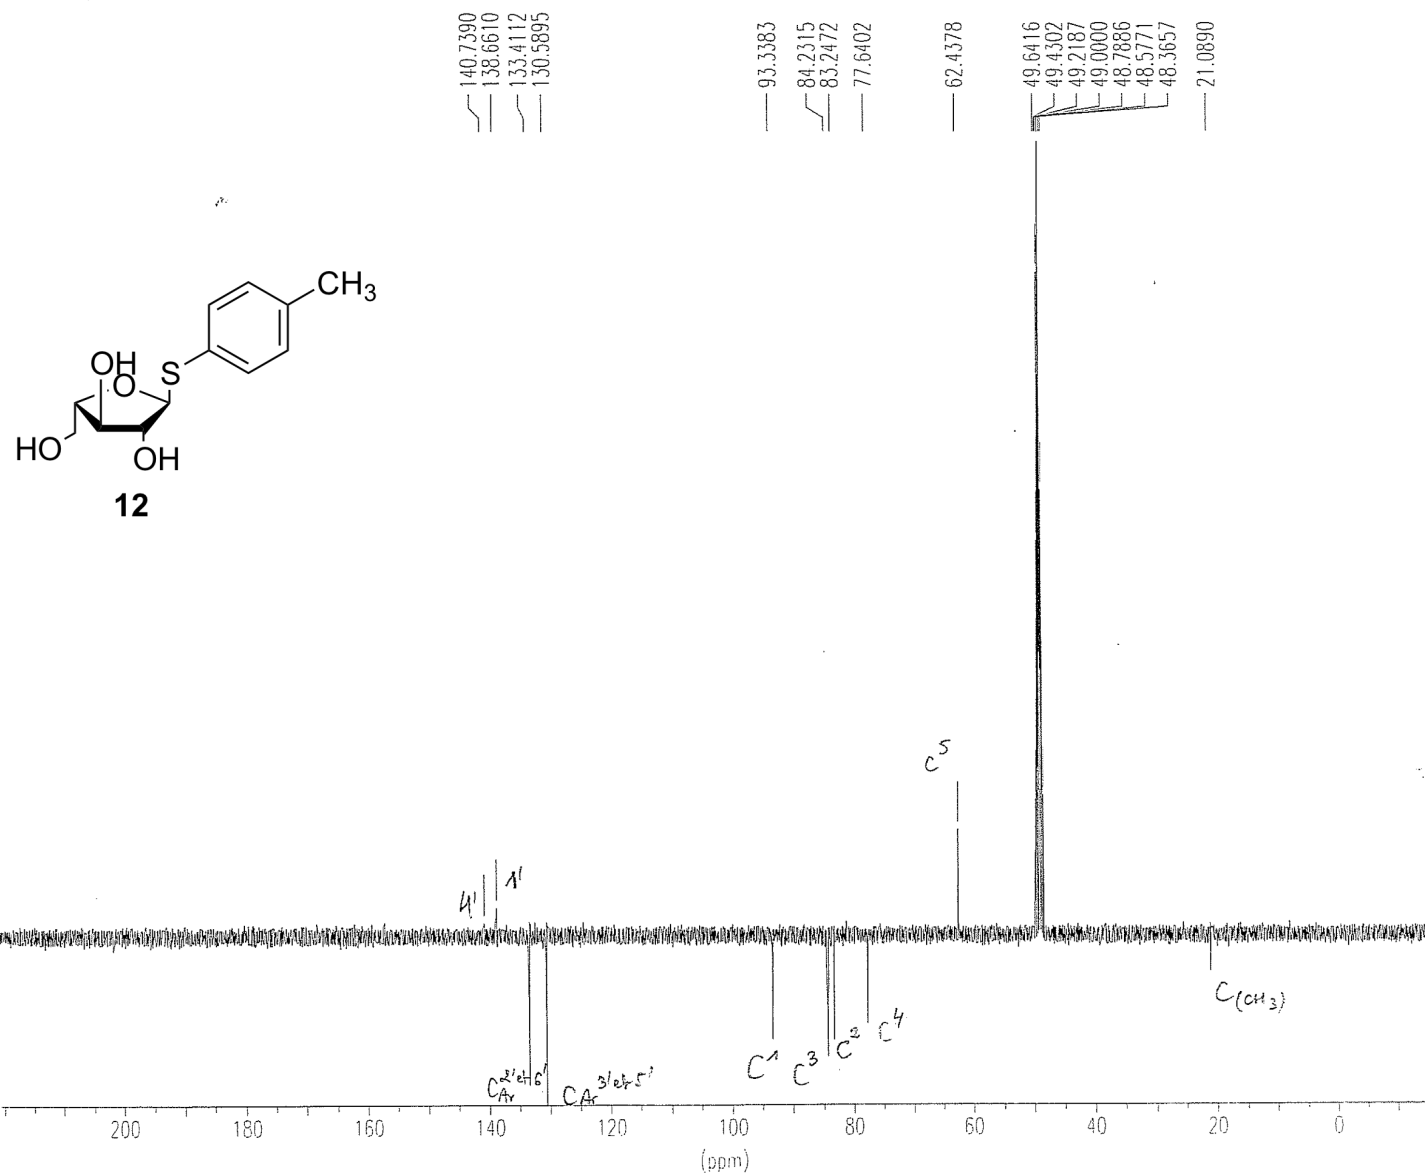

\*\*\* Current Data Parameters \*\*\*

NAME : e-ma275

EXPNO : 20

PROCNO : 1

\*\*\* Acquisition Parameters \*\*\*

CNST[31] : 1.0000000

CNST[63] : 1.0000000

DATEt : 23:05:49

DATEd : May 06 2009

NS : 1024

NUCLEUS : off

SOLVENT : MeOD

SW : 238.8967 ppm

TD : 65536

TE : 297.0 K

\*\*\* 1D NMR Plot Parameters \*\*\*

SR : -142.30 Hz

ppmcm : 11.27

Hzcm : 1133.89

AQtime : 1.3631490 sec

NUCLEUS : off

SOLVENT : ?

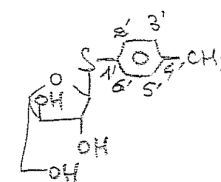

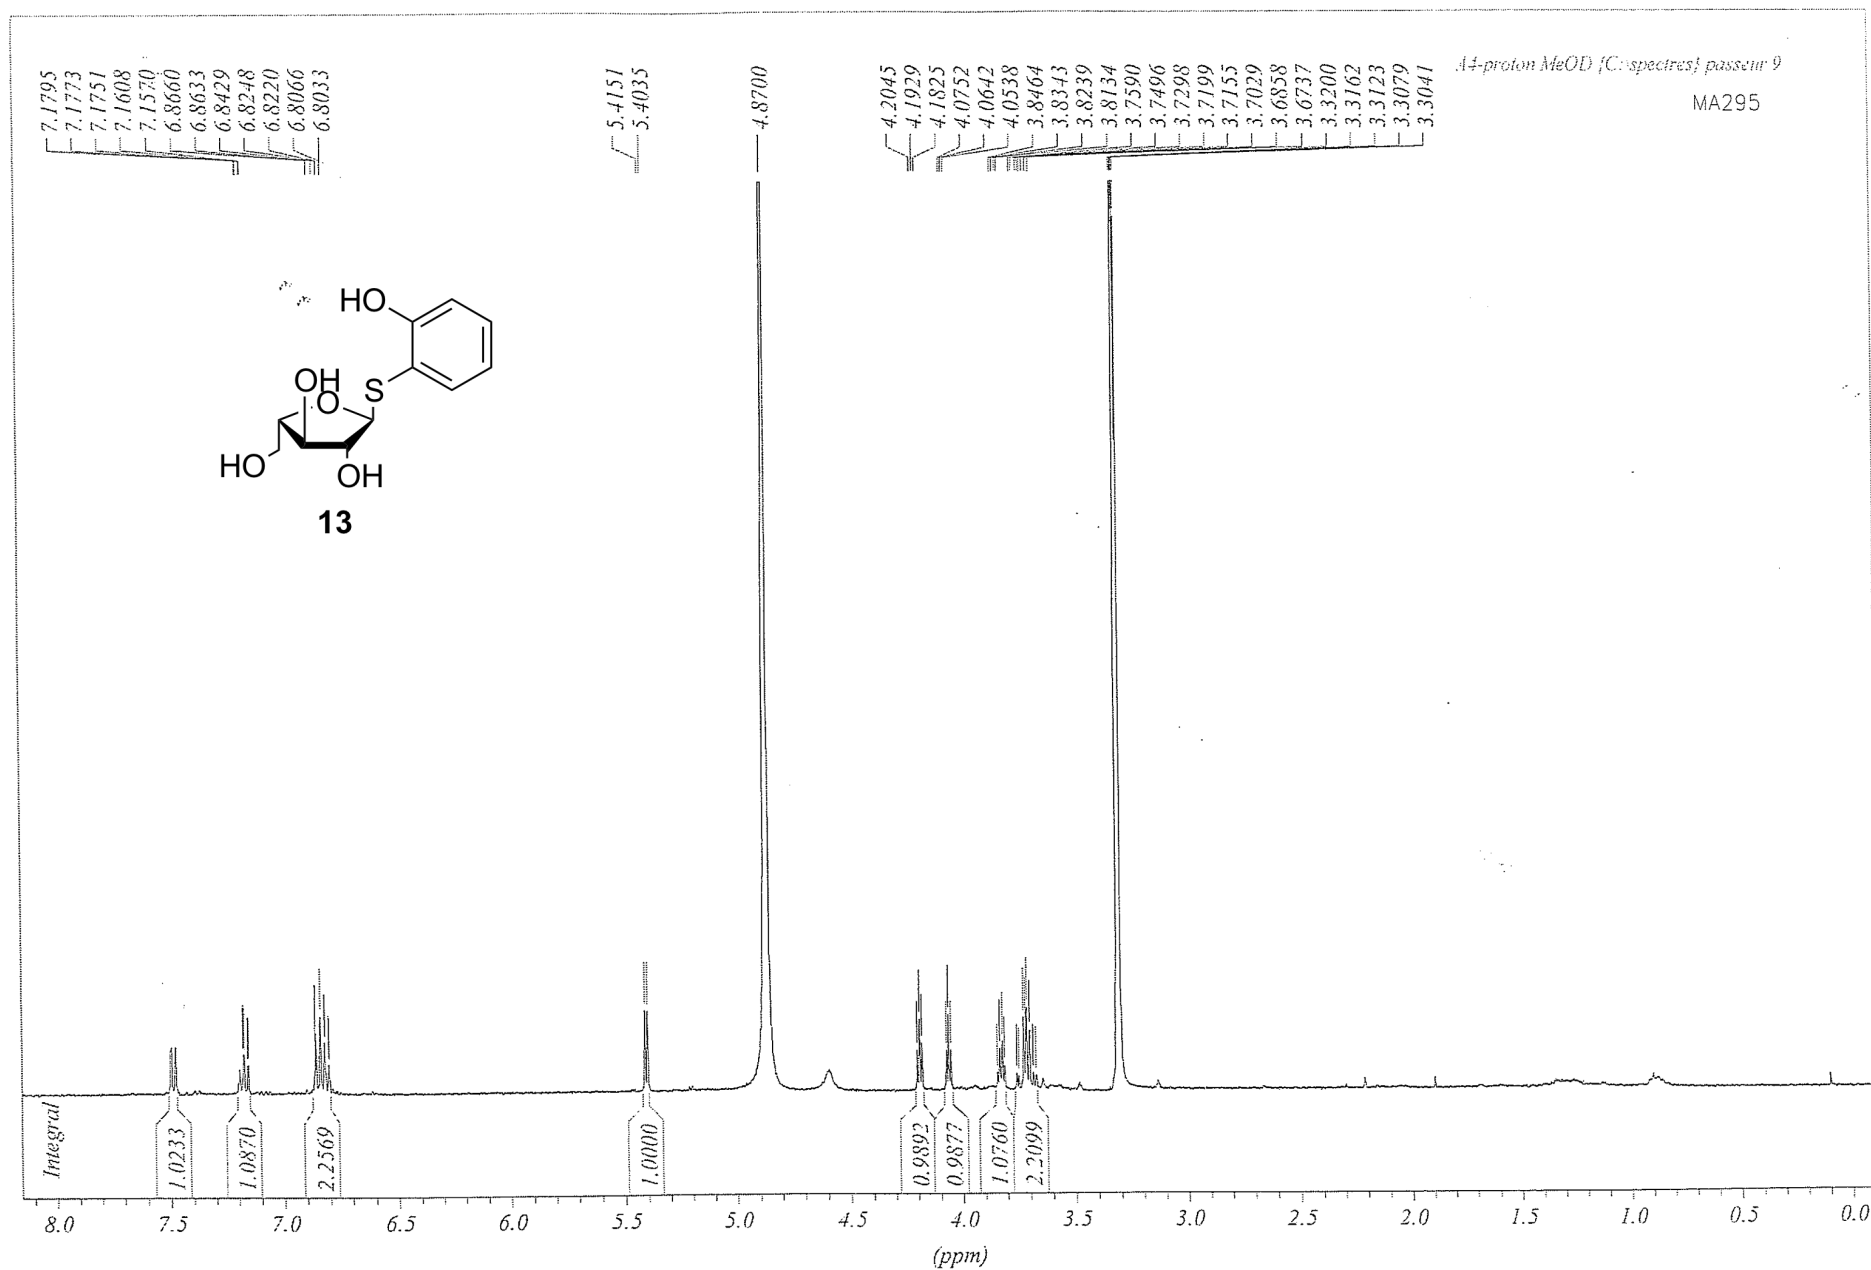

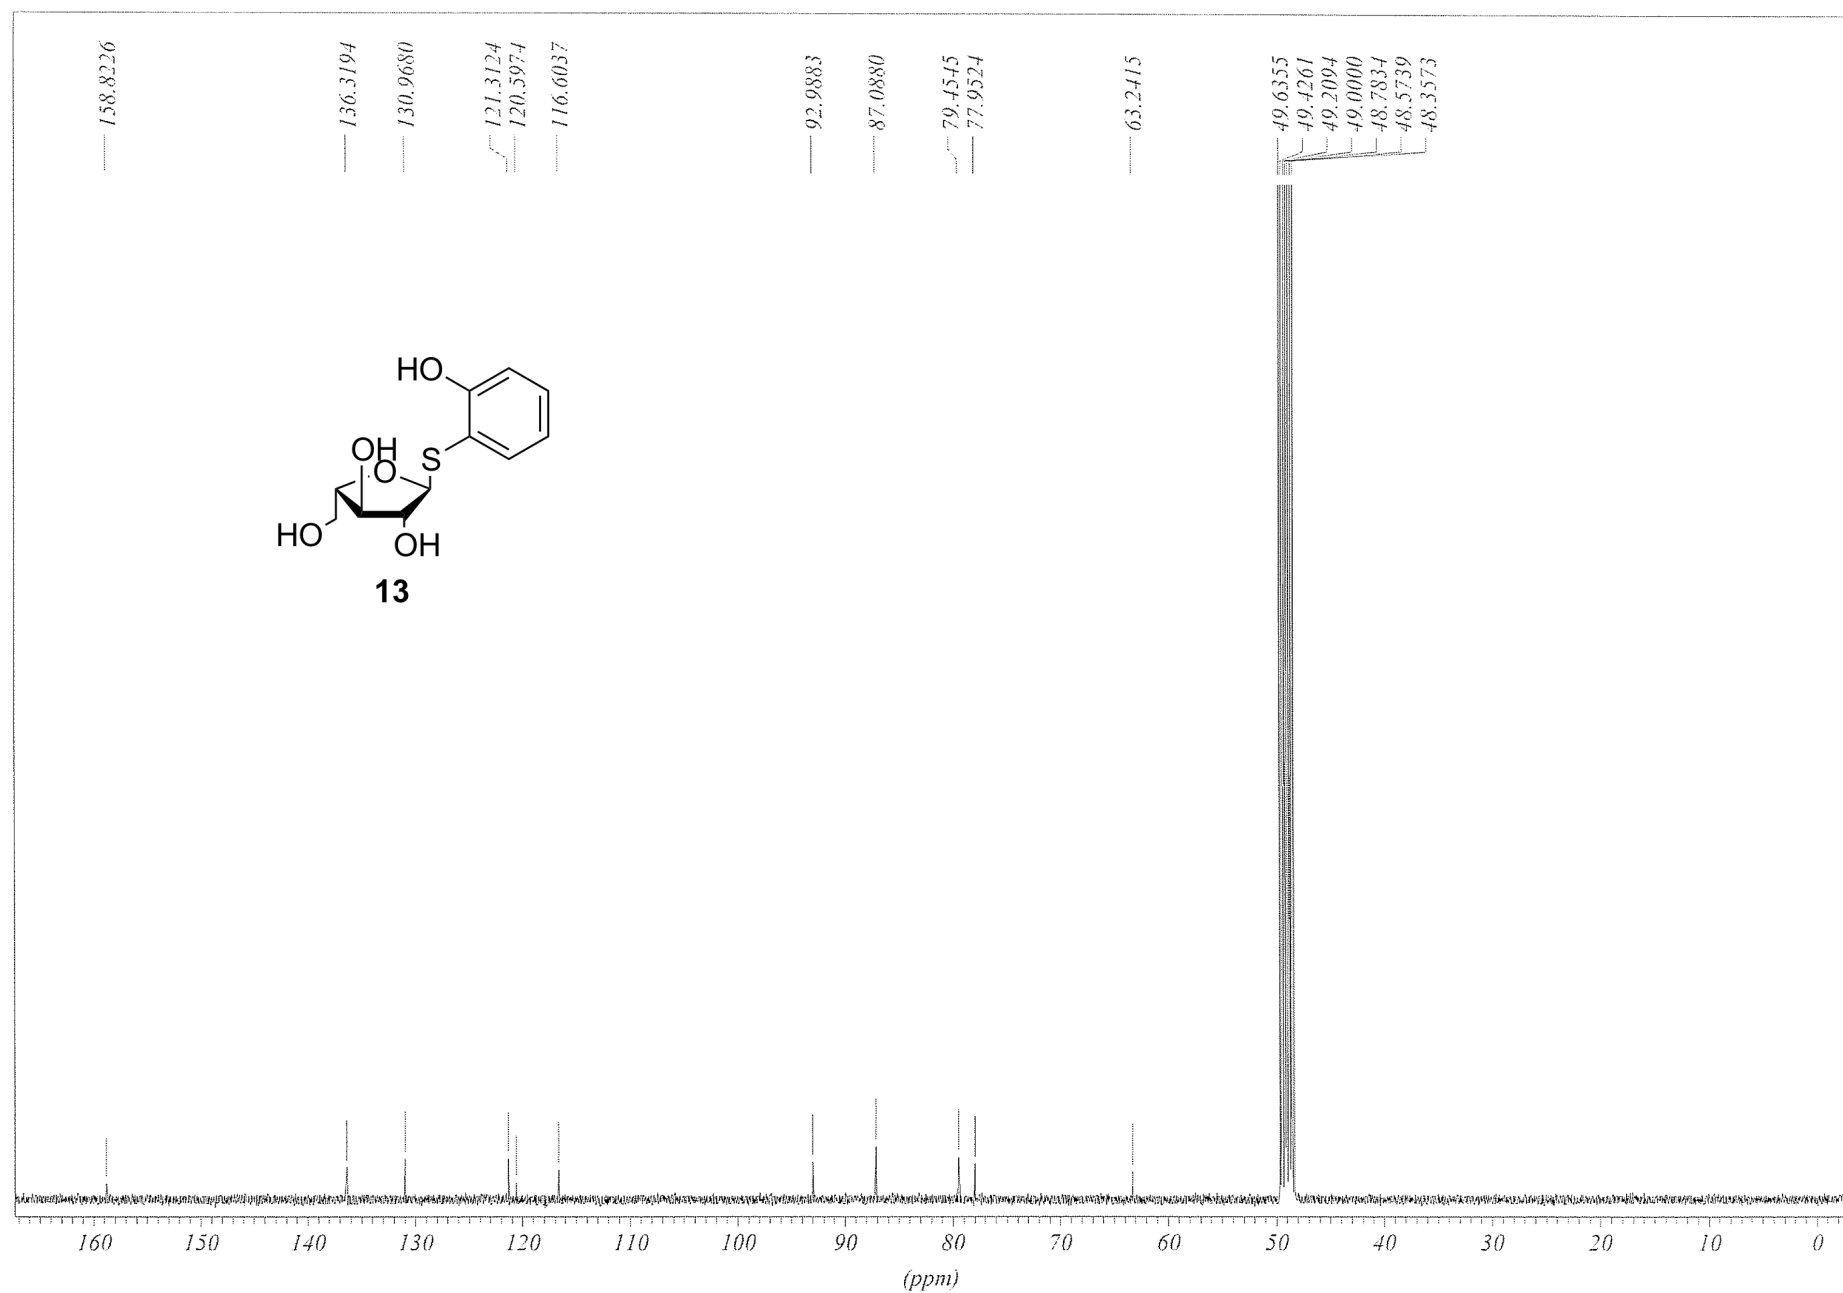

A4-proton32 MeOD {C:\spectres\ passeur 28

NA 262F1

\*\*\* Current Data Parameters \*\*\*

NAME : e-ma26~1

EXPNO : 10

PROCNO : 1

\*\*\* Acquisition Parameters \*\*\*

CNST[31] : 1.0000000

CNST[63] : 1.0000000

DATEt : 04:59:05

DATEd : Apr 03 2009

NS : 32

NUCLEUS : off

SOLVENT : MeOD

SW : 18.0229 ppm

TD : 65536

TE : 292.7 K

\*\*\* 1D NMR Plot Parameters \*\*\*

SR : 16.37 Hz

ppmcm : 0.41

HZcm : 165.78

AQtime : 4.5438290 sec

NUCLEUS : off

SOLVENT : ?

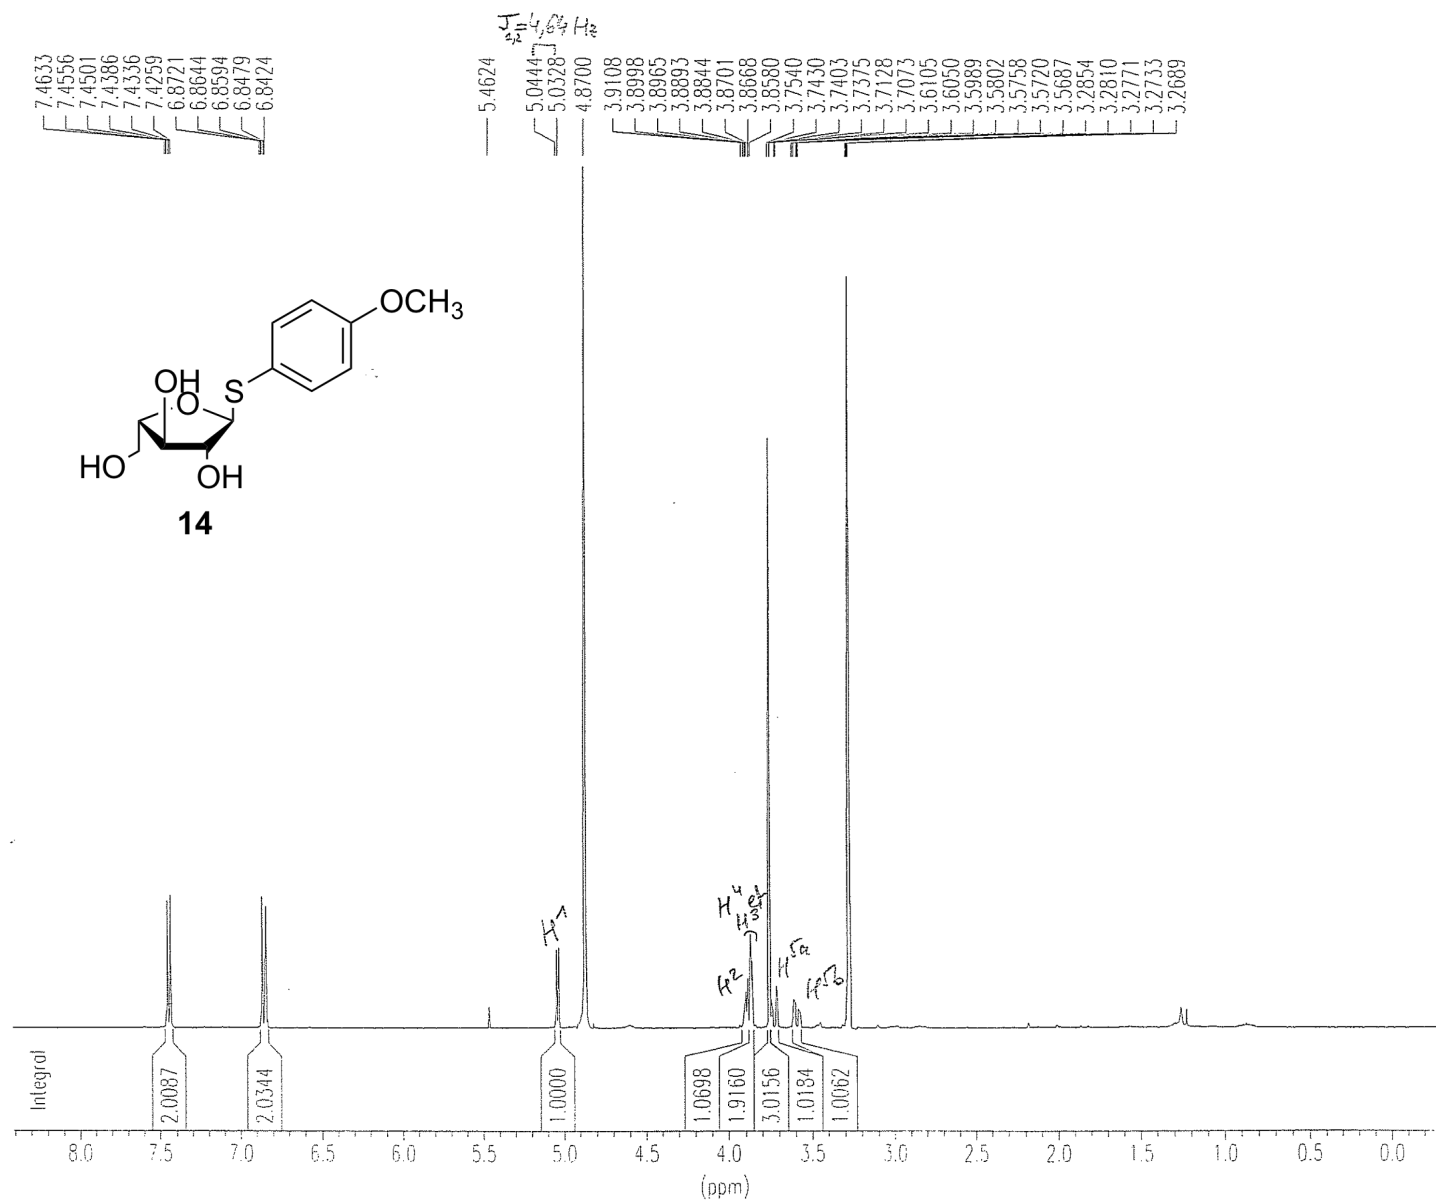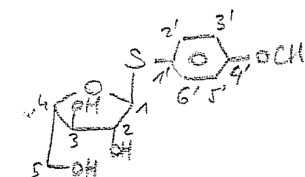

A4-C13CPD1024 MeOD {C:\spectres\ passeur 45

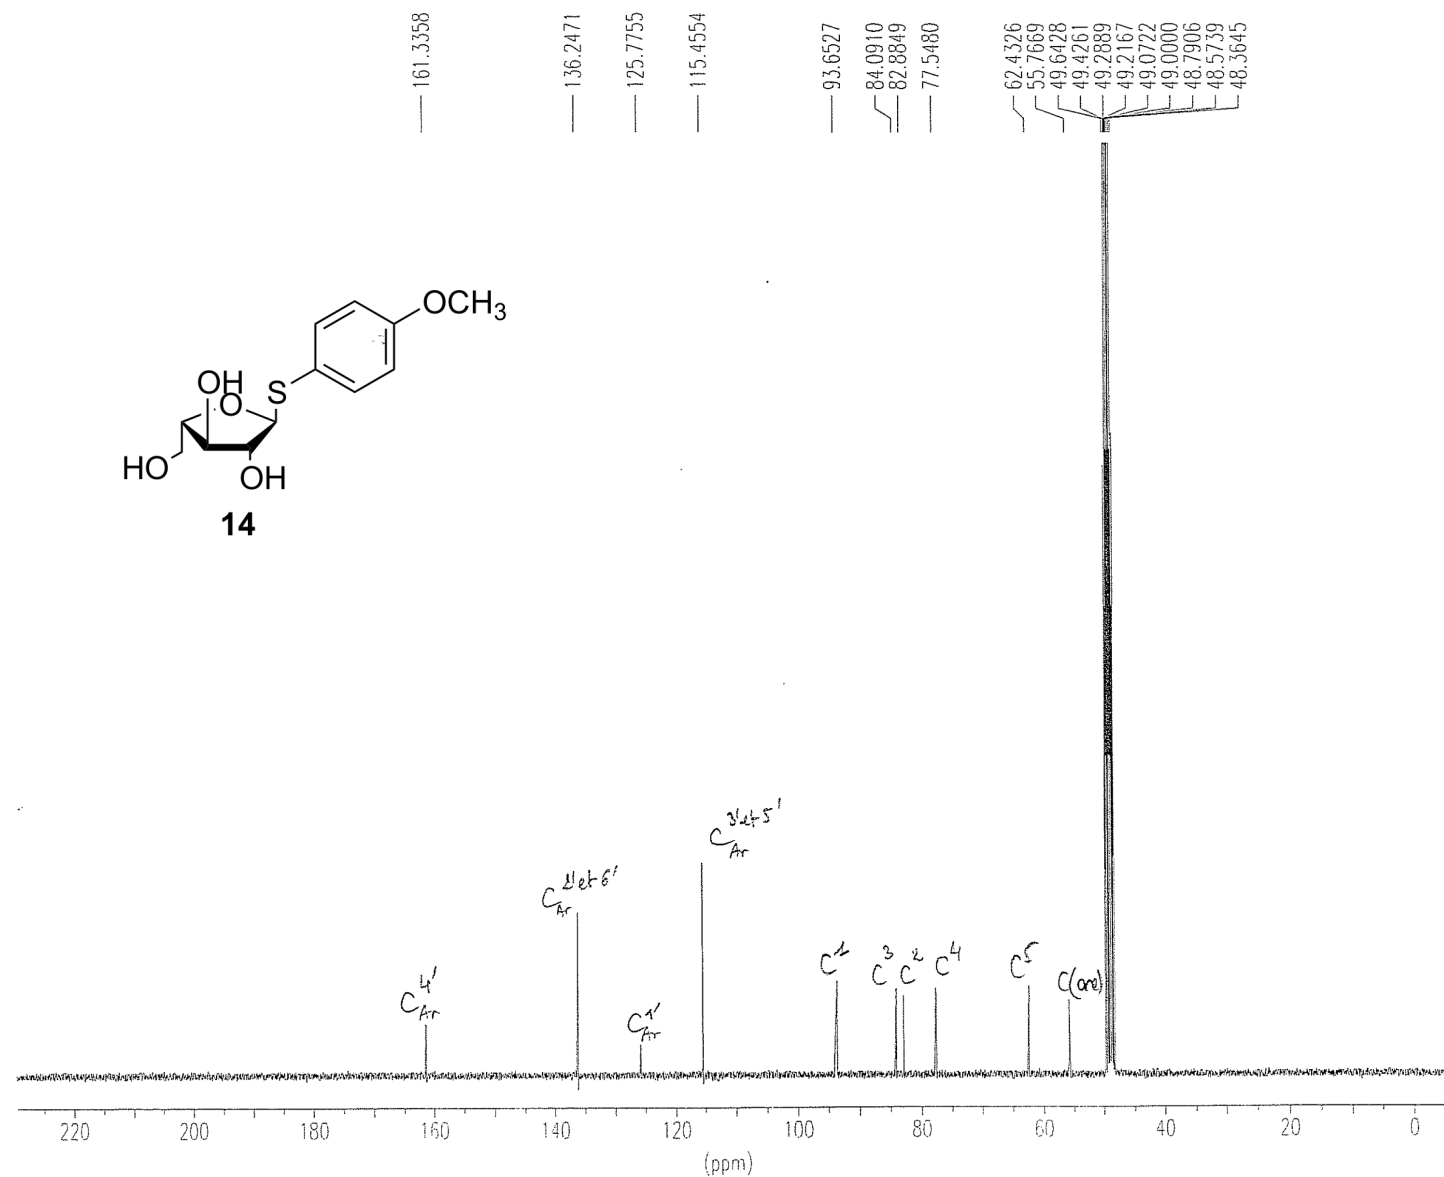

\*\*\* Current Data Parameters \*\*\*  
NAME : e-mg26-2-  
EXPNO : 10  
PROCNO : 1  
\*\*\* Acquisition Parameters \*\*\*  
CNST[31] : 1.0000000  
CNST[63] : 1.0000000  
DATEt : 21:42:46  
DATEd : Apr 04 2009  
NS : 4096  
NUCLEUS : off  
SOLVENT : MeOD  
SW : 236.6191 ppm  
TD : 65536  
TE : 293.4 K  
\*\*\* 1D NMR Plot Parameters \*\*\*  
SR : -142.65 Hz  
ppmcm : 11.16  
Hzcm : 1123.09  
AQtime : 1.3762560 sec  
NUCLEUS : off  
SOLVENT : ?

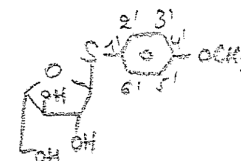

A4-proton32 MeOD {C:\spectres} passeur 1

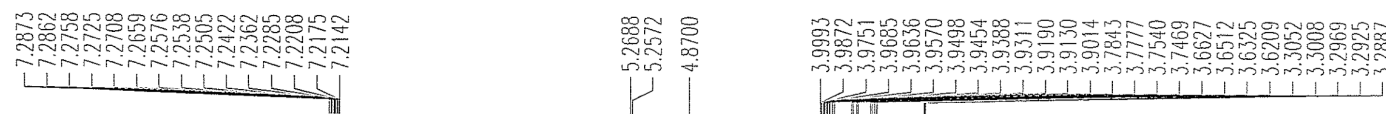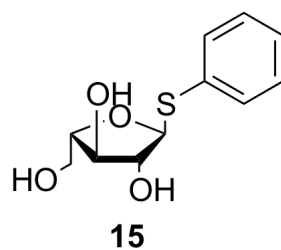

\*\*\* Current Data Parameters \*\*\*

NAME : e-ma186p  
EXPNO : 10  
PROCNO : 1

\*\*\* Acquisition Parameters \*\*\*

CNST[31] : 1.0000000  
CNST[63] : 1.0000000  
DATEt : 01:01:25  
DATEd : Sep 16 2008  
NS : 32  
NUCLEUS : off  
SOLVENT : MeOD  
SW : 18.0229 ppm  
TD : 65536  
TE : 295.1 K

\*\*\* 1D NMR Plot Parameters \*\*\*

SR : 8.45 Hz  
ppmcm : 0.46  
Hzcm : 183.67  
AQtime : 4.5438290 sec  
NUCLEUS : off  
SOLVENT : ?

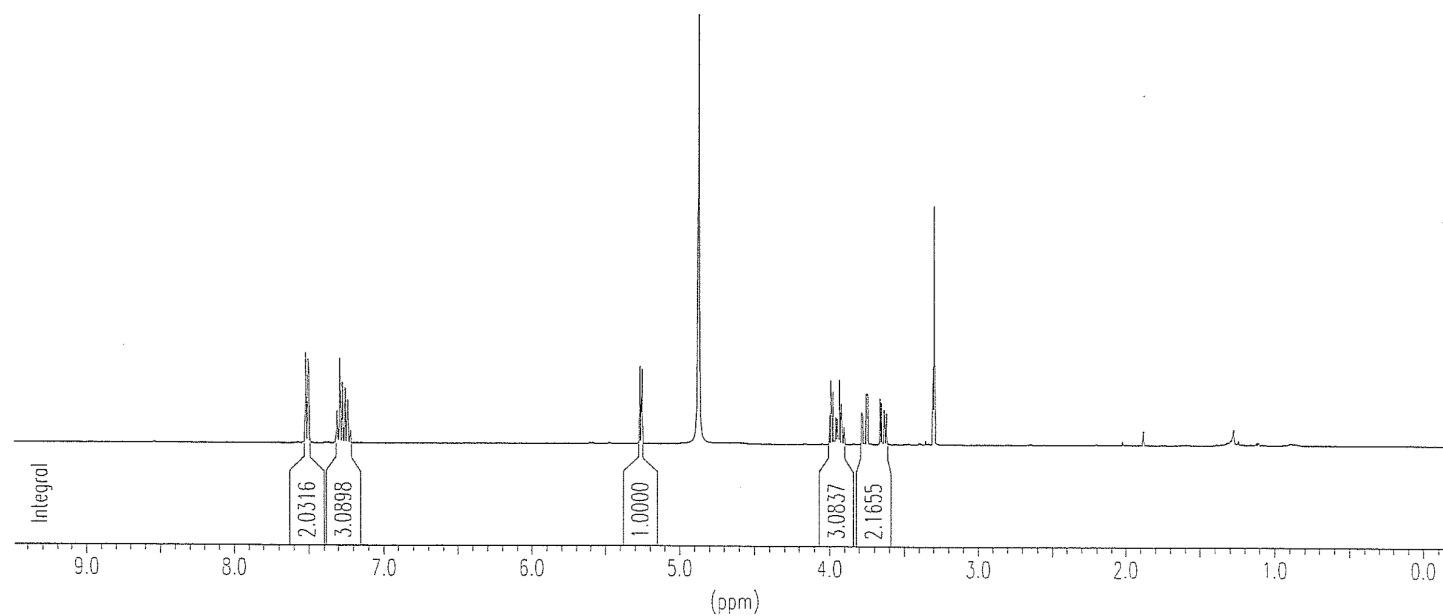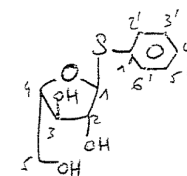



A4-Jmod1024 MeOD {C:\spectres} passeur 15

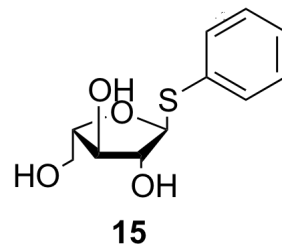

\*\*\* Current Data Parameters \*\*\*

NAME : e-ma186p  
EXPNO : 40  
PROCNO : 1

\*\*\* Acquisition Parameters \*\*\*

CNST[31] : 1.0000000  
CNST[63] : 1.0000000  
DATEt : 04:38:26  
DATEd : Sep 18 2008  
NS : 1024  
NUCLEUS : off  
SOLVENT : MeOD  
SW : 238.8967 ppm  
TD : 65536  
TE : 296.1 K

\*\*\* 1D NMR Plot Parameters \*\*\*

SR : -141.57 Hz  
ppmcm : 11.27  
Hzcm : 1133.89  
AQtime : 1.3631490 sec  
NUCLEUS : off  
SOLVENT : ?

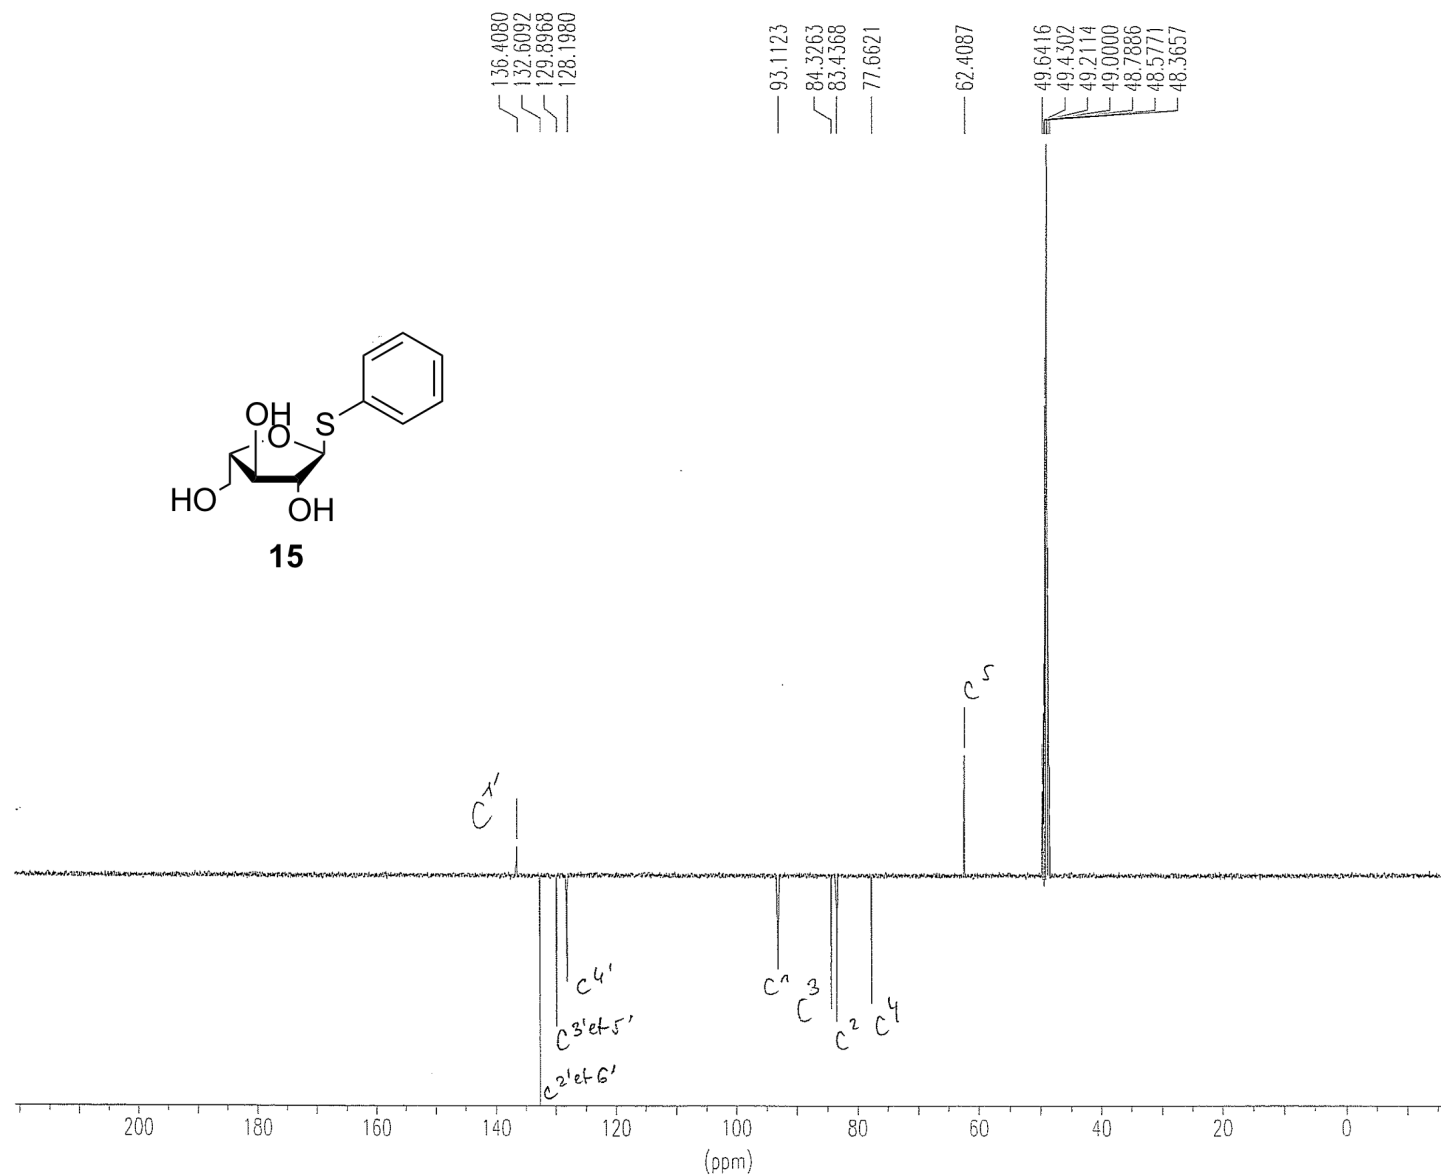

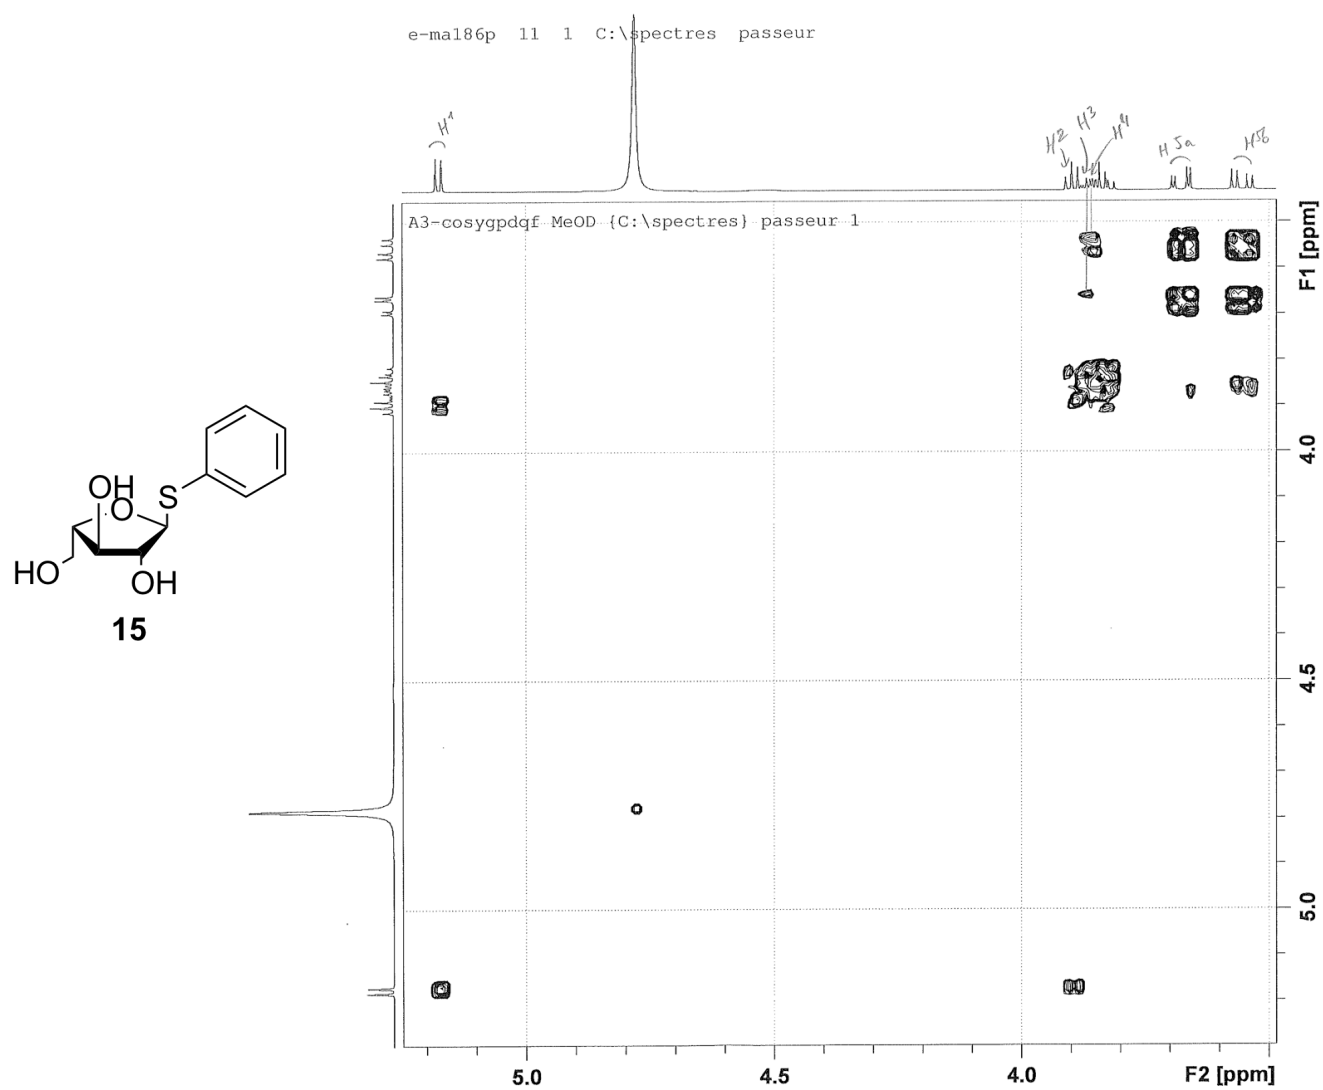

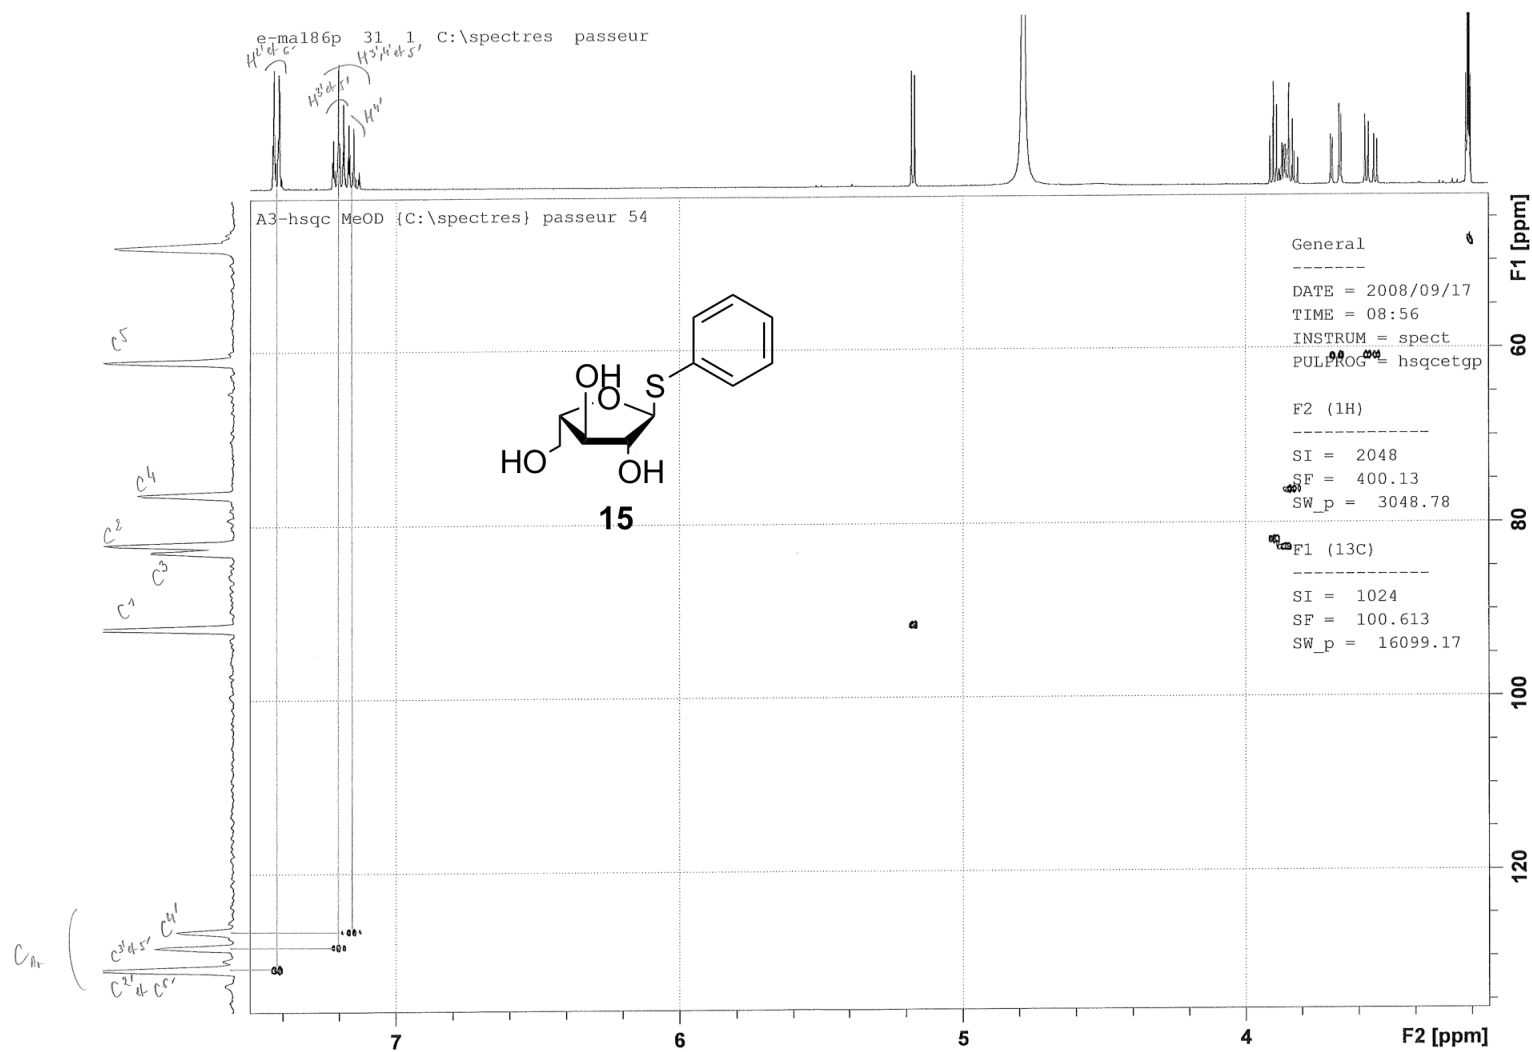

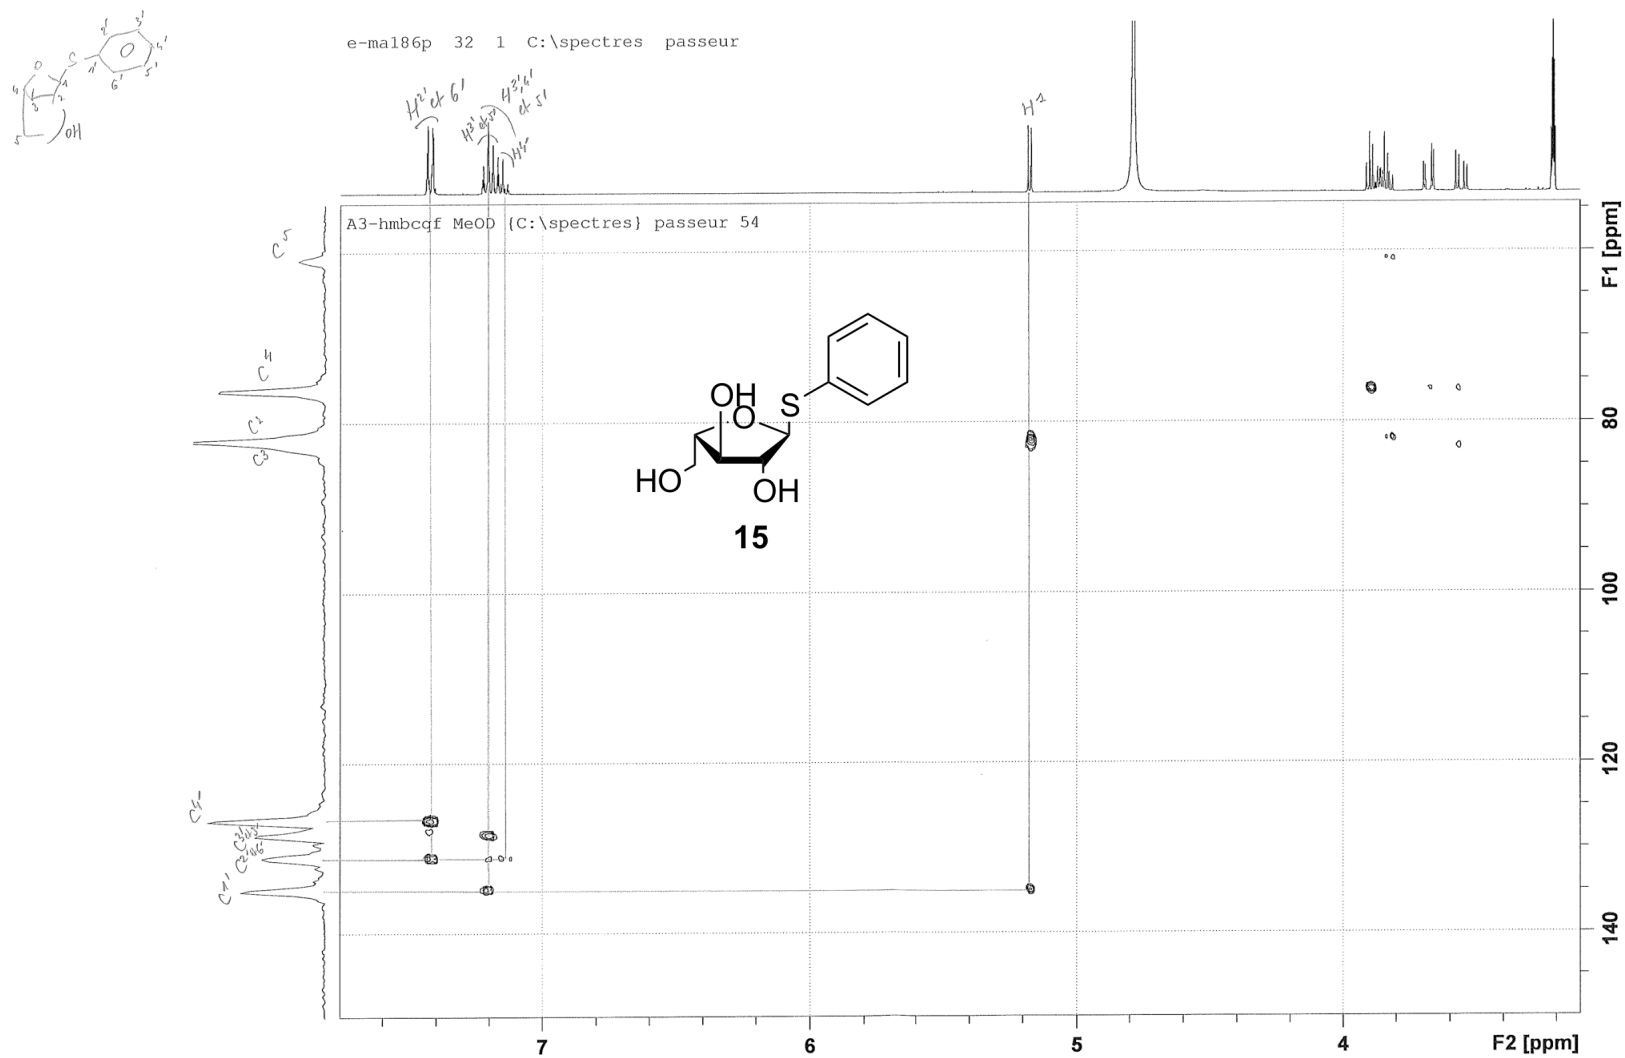

A4-proton32 MeOD {C:\spectres\ passeur 4

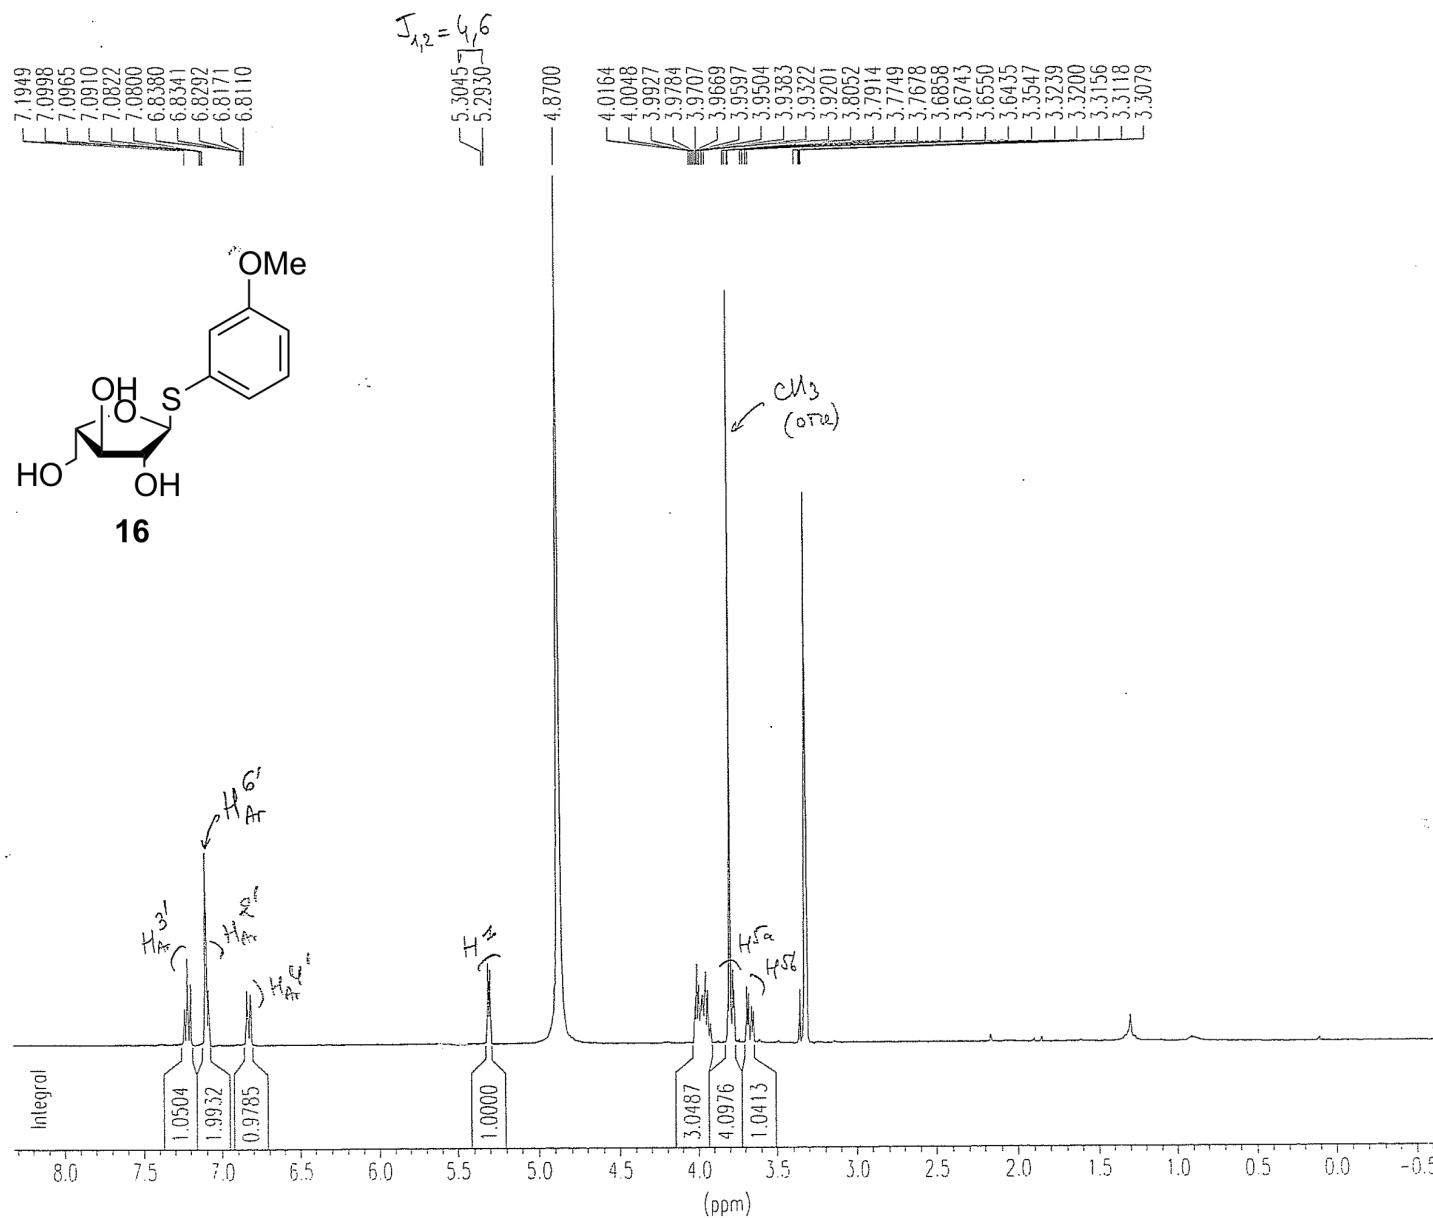

A4-Jmod1024 MeOD {C:\spectres\ passeur 6

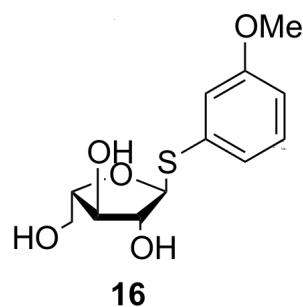

\*\*\* Current Data Parameters \*\*\*

NAME : e-ma263

EXPNO : 30

PROCNO : 1

\*\*\* Acquisition Parameters \*\*\*

CNST[31] : 1.0000000

CNST[63] : 1.0000000

DATEt : 12:42:52

DATEd : Apr 10 2009

NS : 2048

NUCLEUS : off

SOLVENT : MeOD

SW : 238.8967 ppm

TD : 65536

TE : 297.0 K

\*\*\* 1D NMR Plot Parameters \*\*\*

SR : -141.57 Hz

ppmcm : 11.27

Hzcm : 1133.89

AQtime : 1.3631490 sec

NUCLEUS : off

SOLVENT : ?

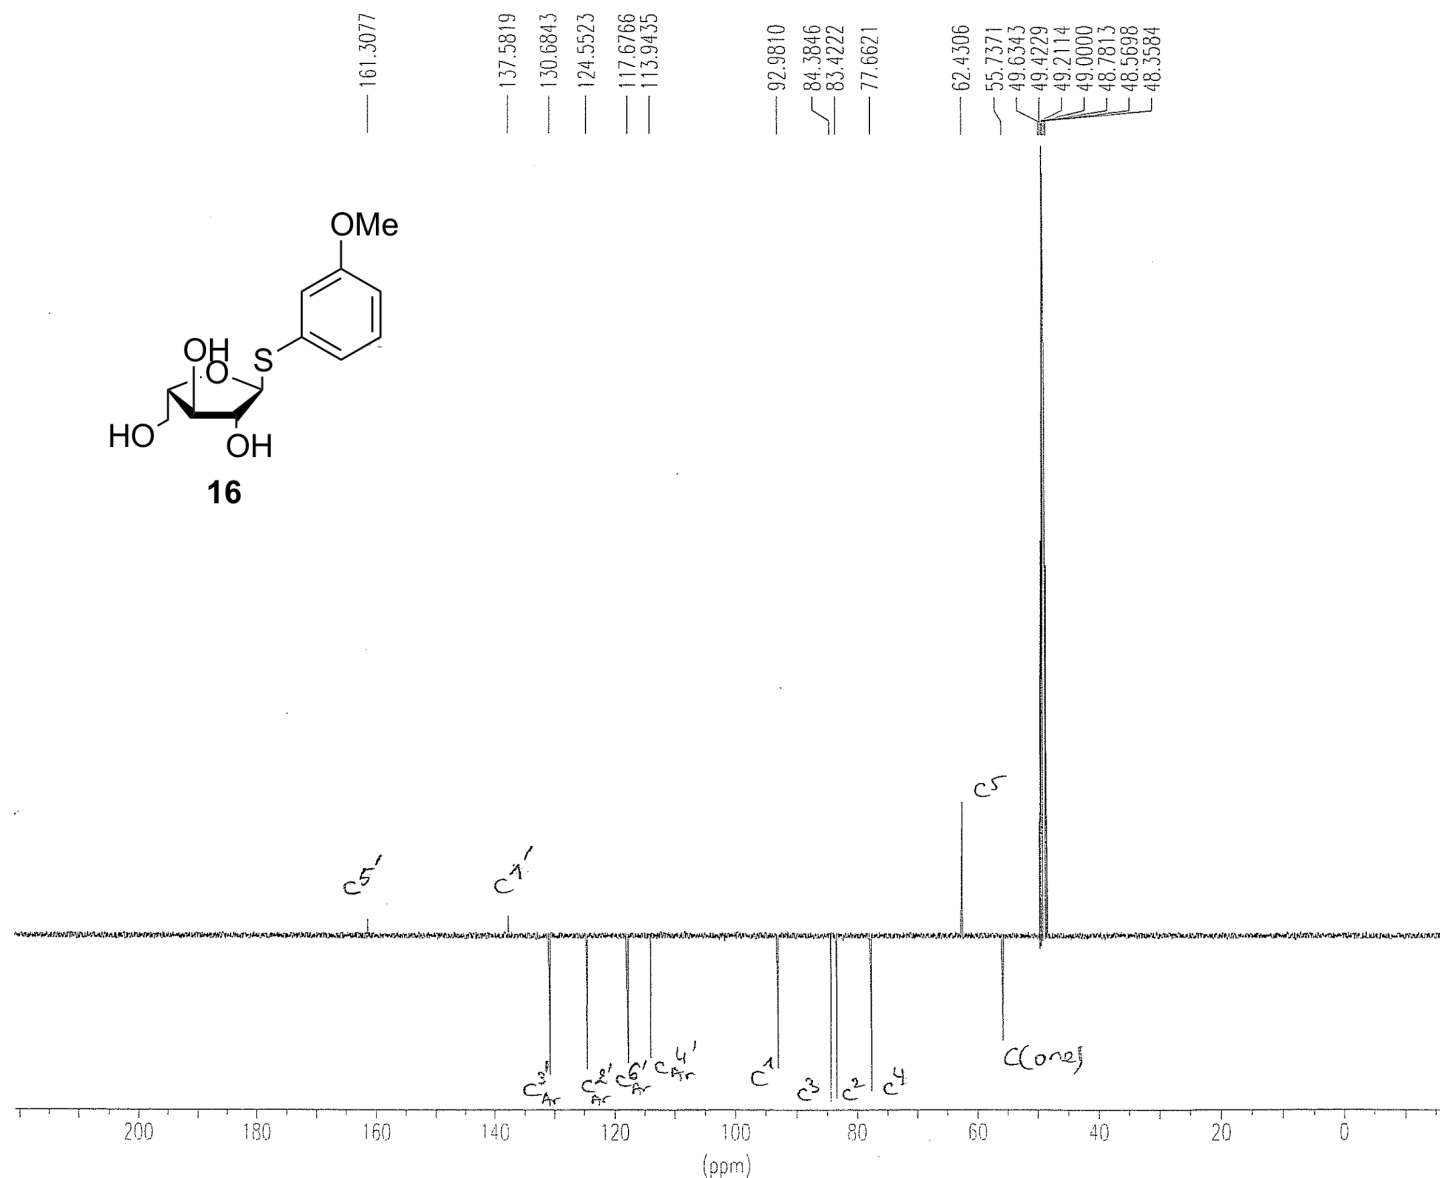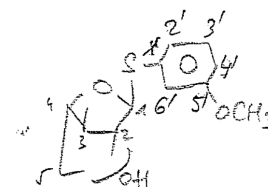

A4-proton32 MeOD {C:\spectres\ passeur 19

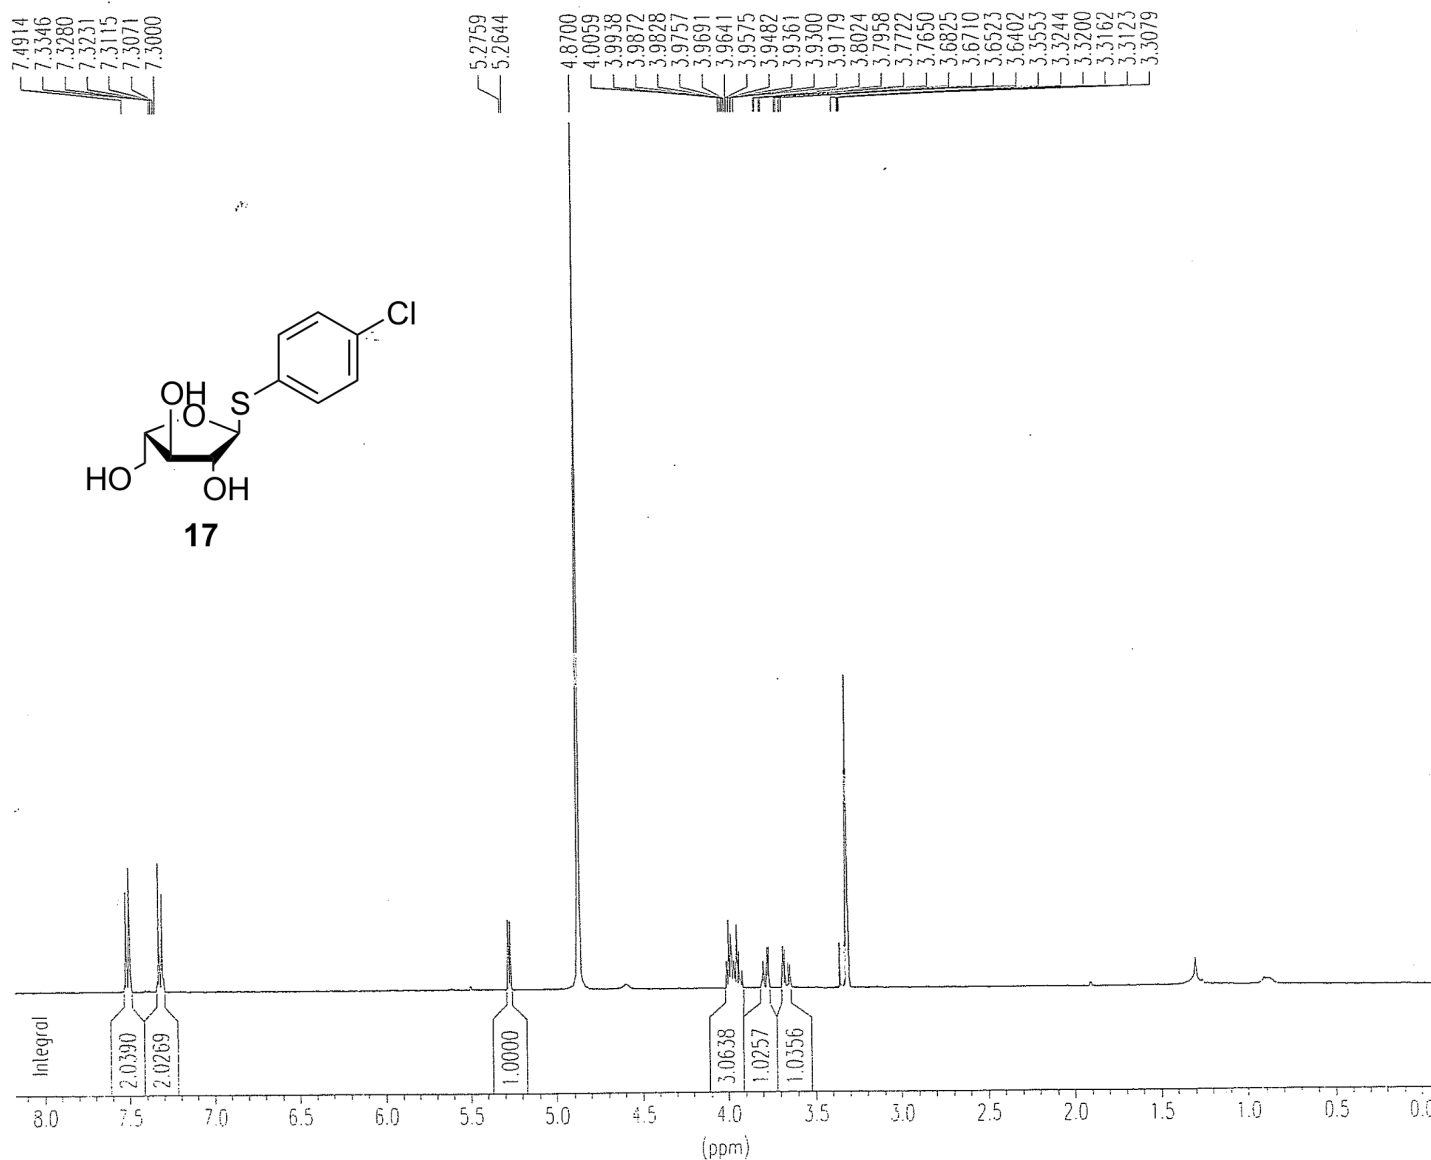

\*\*\* Current Data Parameters \*\*\*  
NAME : e-ma289  
EXPNO : 10  
PROCNO : 1  
\*\*\* Acquisition Parameters \*\*\*  
CNST[31] : 1.0000000  
CNST[63] : 1.0000000  
DATEt : 08:09:50  
DATEd : Jun 12 2009  
NS : 32  
NUCLEUS : off  
SOLVENT : MeOD  
SW : 18.0229 ppm  
TD : 65536  
TE : 297.0 K  
\*\*\* 1D NMR Plot Parameters \*\*\*  
SR : 0.75 Hz  
ppmcm : 0.39  
Hzcm : 156.83  
AQtime : 4.5438290 sec  
NUCLEUS : off  
SOLVENT : ?

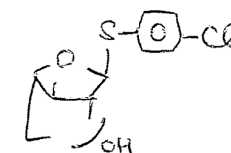

\*\*\* Current Data Parameters \*\*\*

NAME : e-ma254

EXPNO : 10

PROCNO : 1

A4-Jmod1024 MeOD {C:\spectres} passeur 34

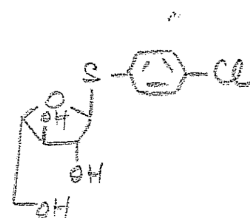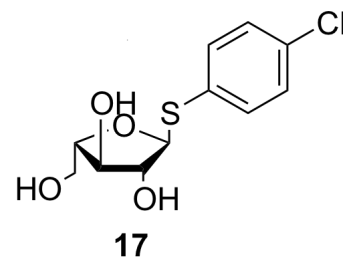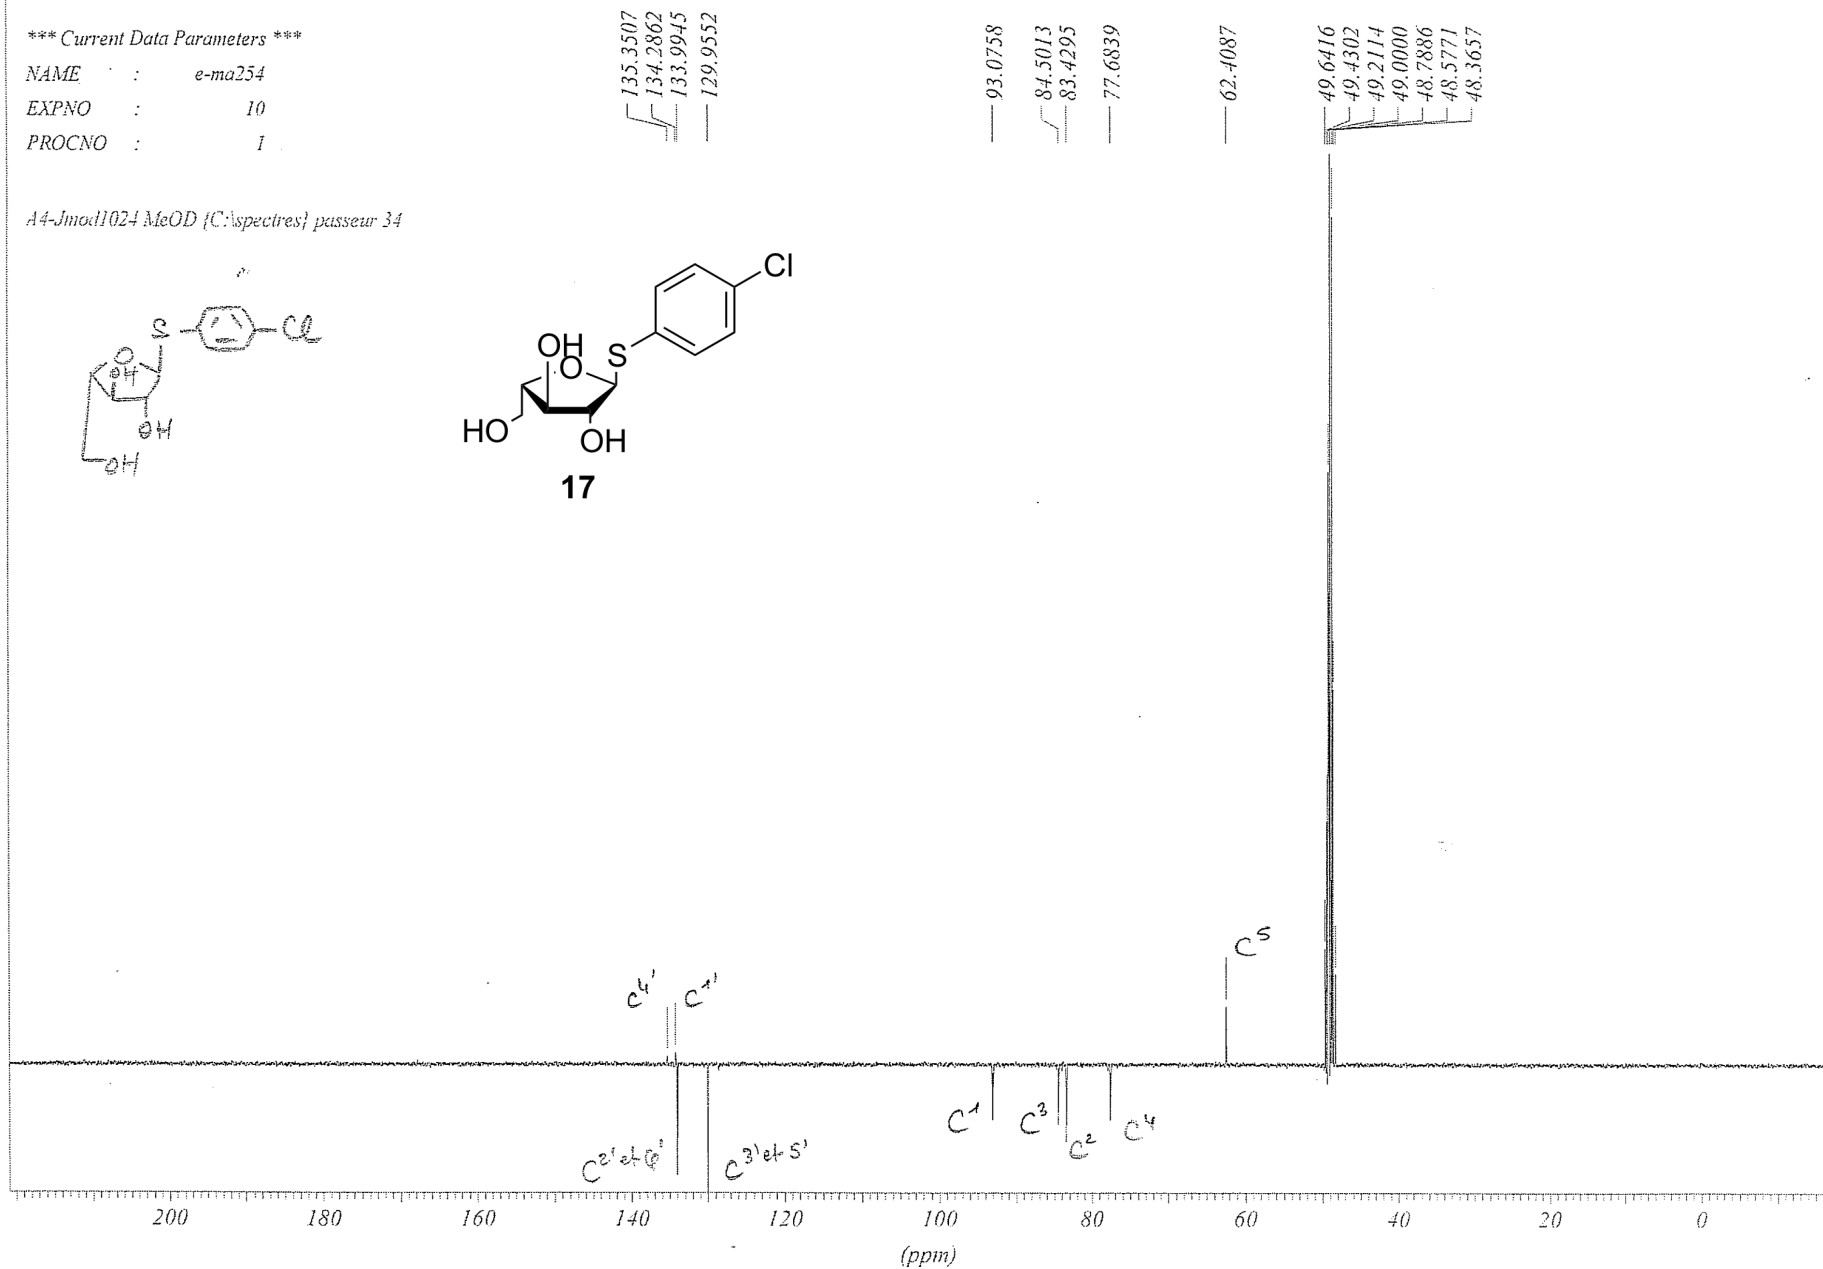



A4-proton32 MeOD {C:\spectres\ passeur 14

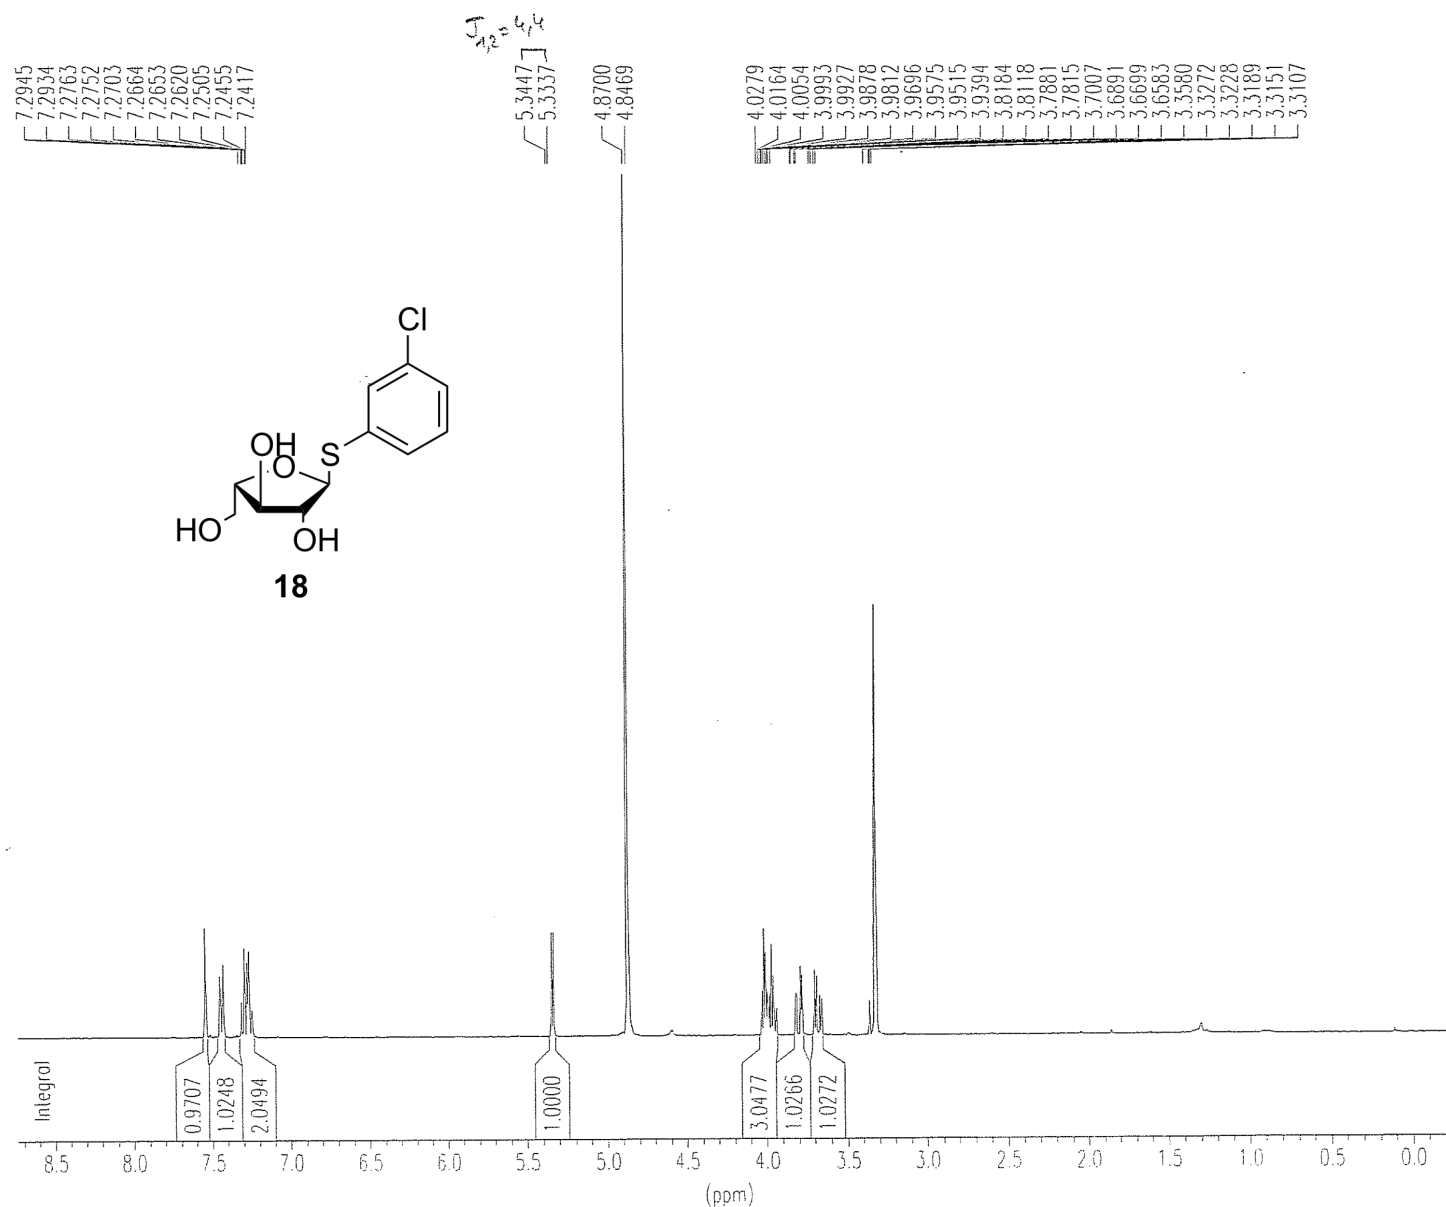

\*\*\* Current Data Parameters \*\*\*

NAME : e-ma260p  
EXPNO : 10  
PROCNO : 1

\*\*\* Acquisition Parameters \*\*\*

CNST[31] : 1.0000000  
CNST[63] : 1.0000000  
DATEt : 08:51:40  
DATEd : Mar 30 2009  
NS : 32  
NUCLEUS : off  
SOLVENT : MeOD  
SW : 18.0229 ppm  
TD : 65536  
TE : 297.0 K

\*\*\* 1D NMR Plot Parameters \*\*\*

SR : -0.57 Hz  
ppmcm : 0.43  
Hzcm : 170.08  
AQtime : 4.5438290 sec  
NUCLEUS : off  
SOLVENT : ?

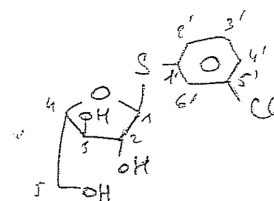

A4-Jmod1024 MeOD {C:\spectres\ passeur 18

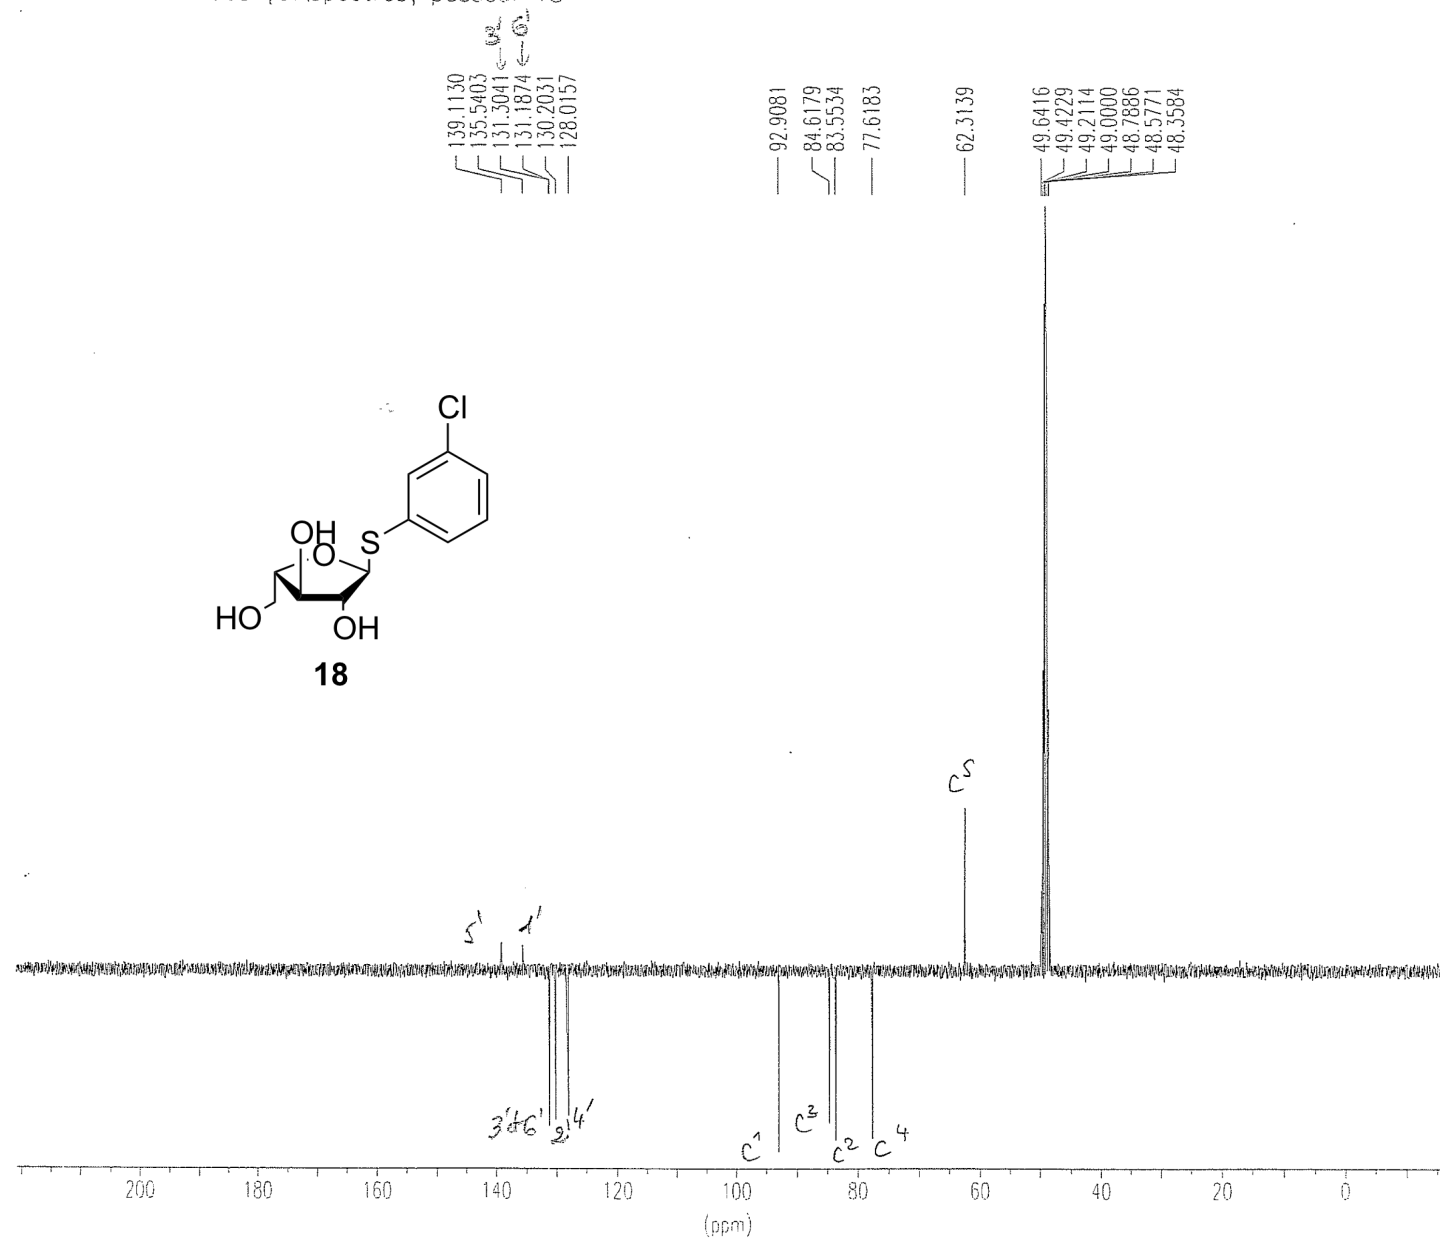

\*\*\* Current Data Parameters \*\*\*

NAME : e-ma260p

EXPNO : 30

PROCNO : 1

\*\*\* Acquisition Parameters \*\*\*

CNST[31] : 1.0000000

CNST[63] : 1.0000000

DATEt : 11:37:46

DATEd : Apr 01 2009

NS : 512

NUCLEUS : off

SOLVENT : MeOD

SW : 238.8967 ppm

TD : 65536

TE : 294.2 K

\*\*\* 1D NMR Plot Parameters \*\*\*

SR : -141.57 Hz

ppmcm : 11.27

Hzcm : 1133.89

AQtime : 1.3631490 sec

NUCLEUS : off

SOLVENT : ?

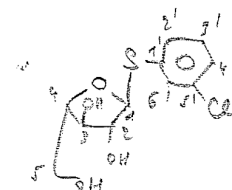

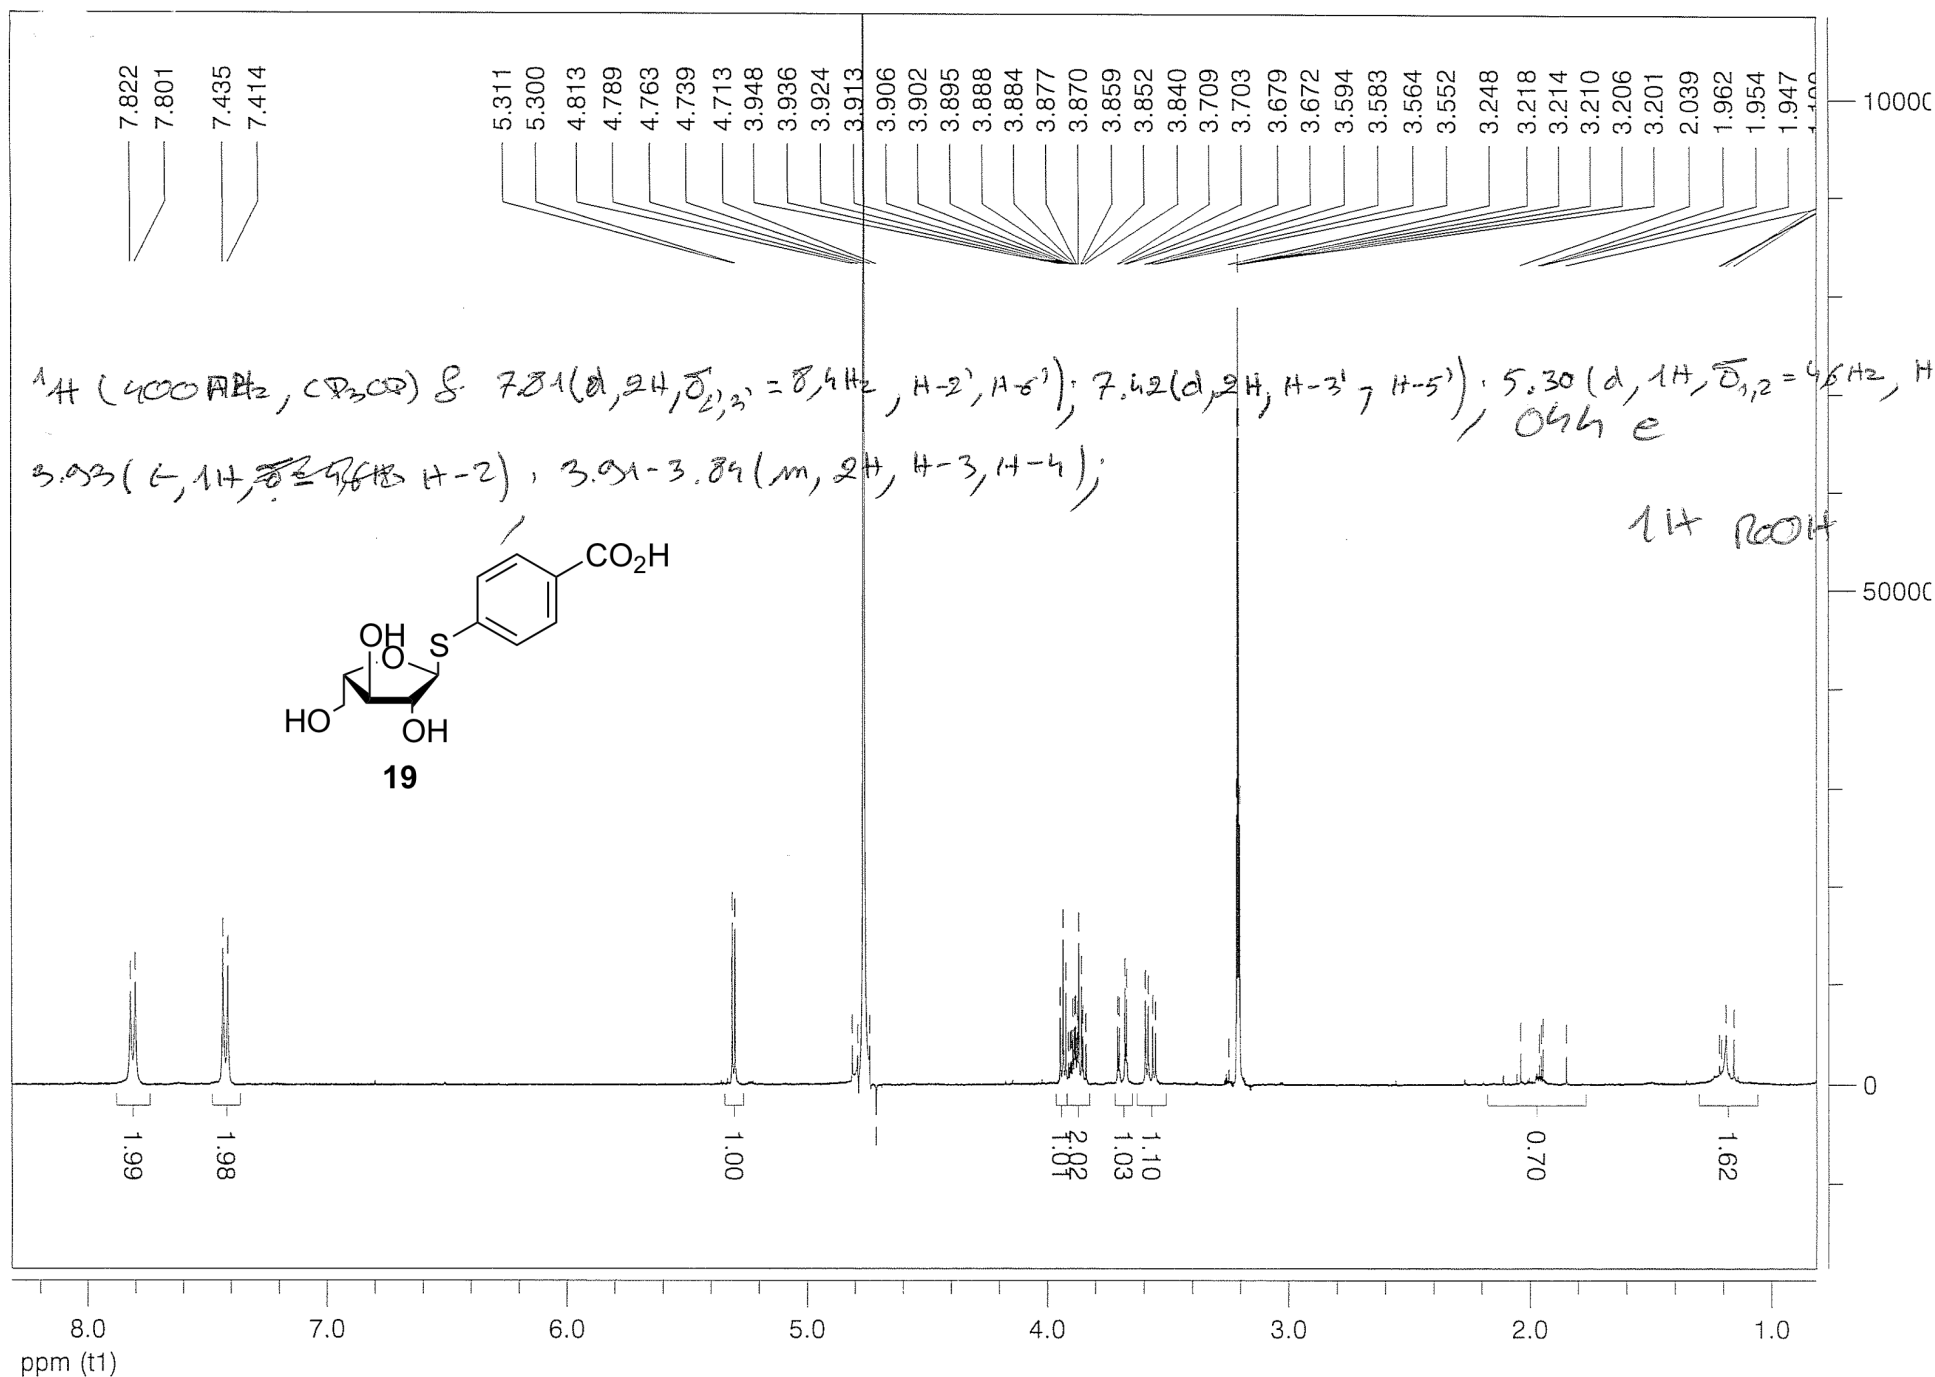

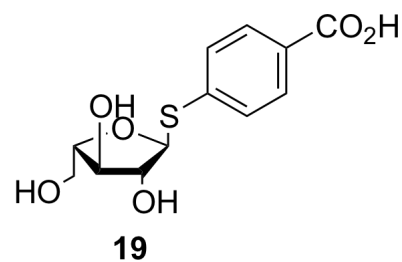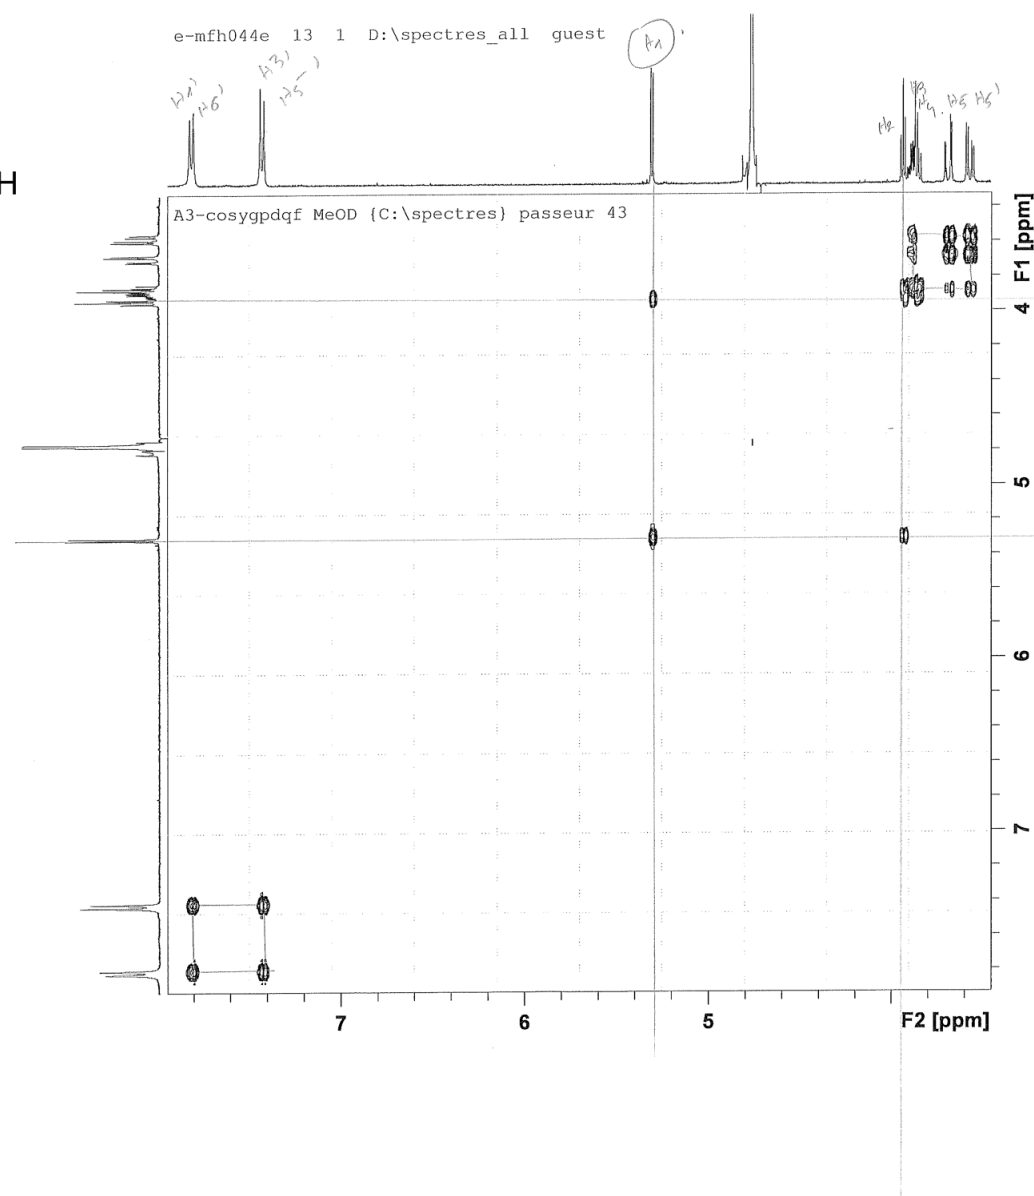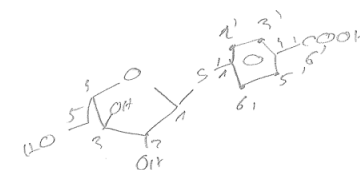

HSQC

e-mfh044e 12 1 D:\spectres\_all quest

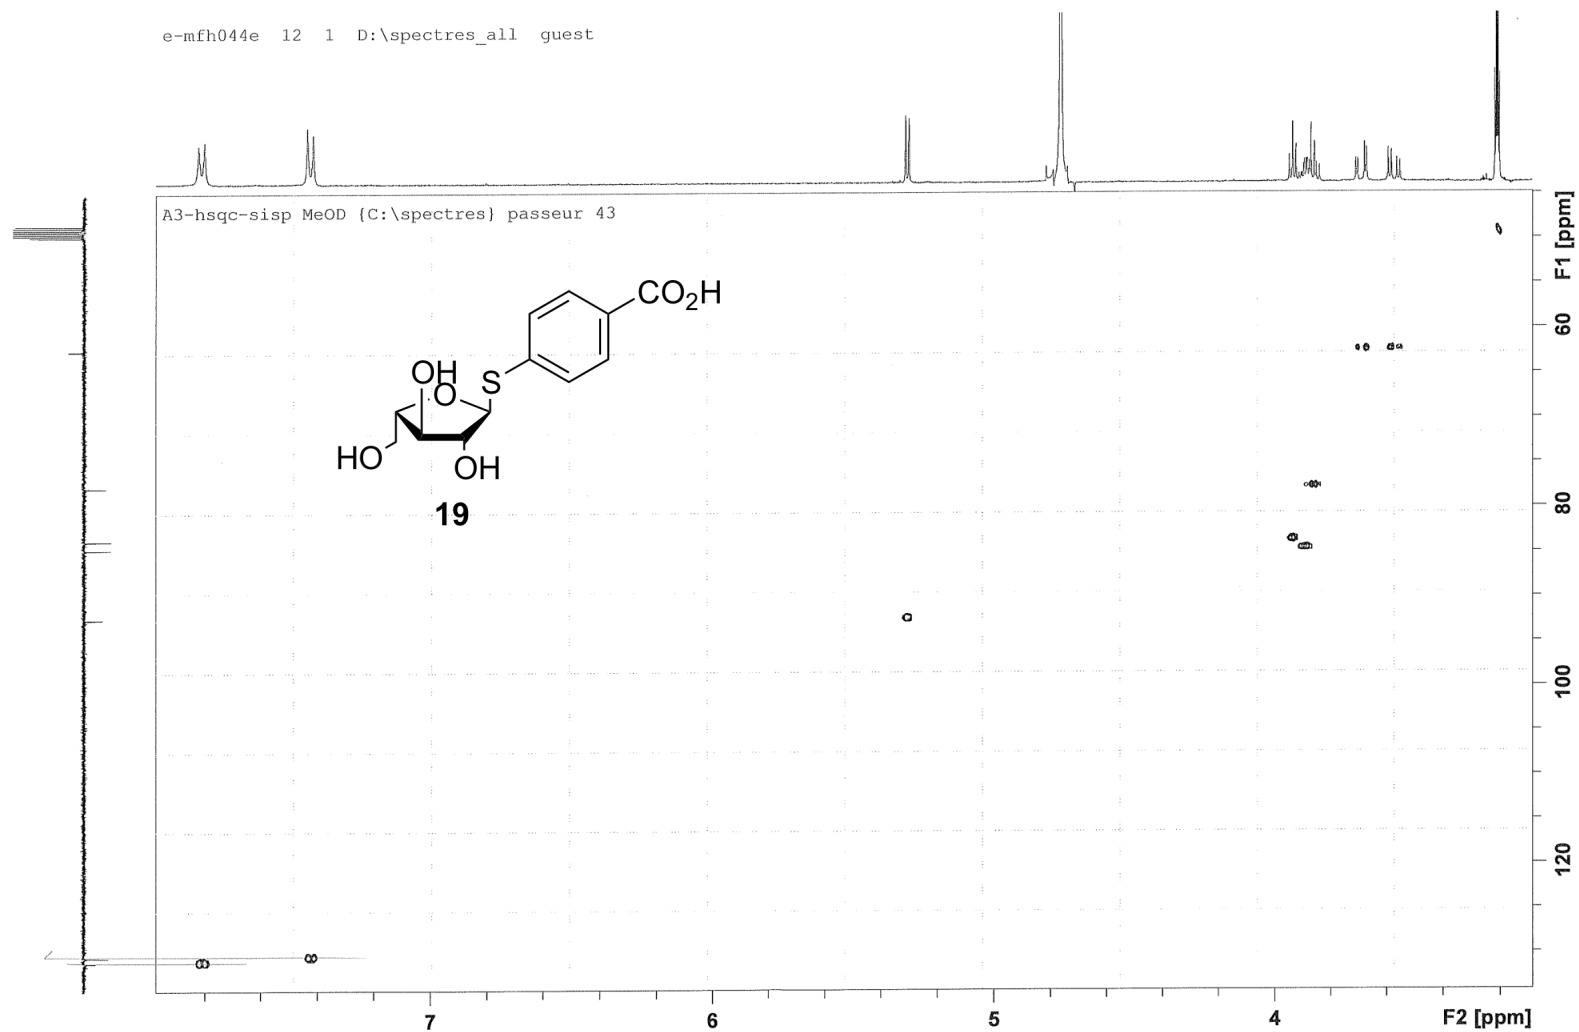

STD NMR of phenyl-1-thio- $\alpha$ -L-arabinofuranoside

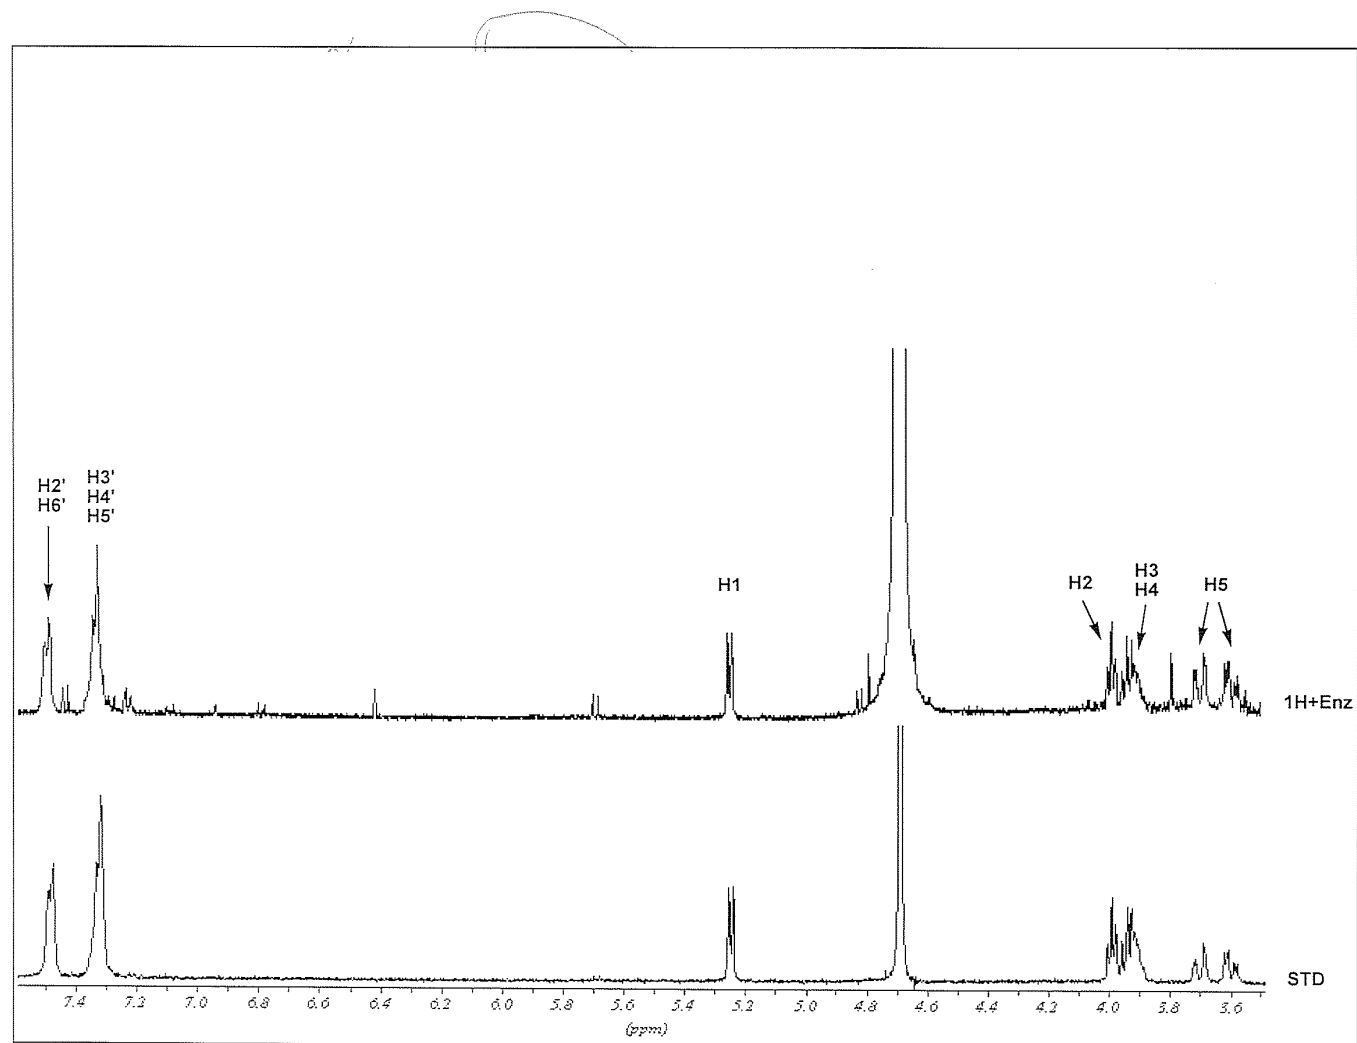

STD NMR of benzyl-1-thio- $\alpha$ -L-arabinofuranoside

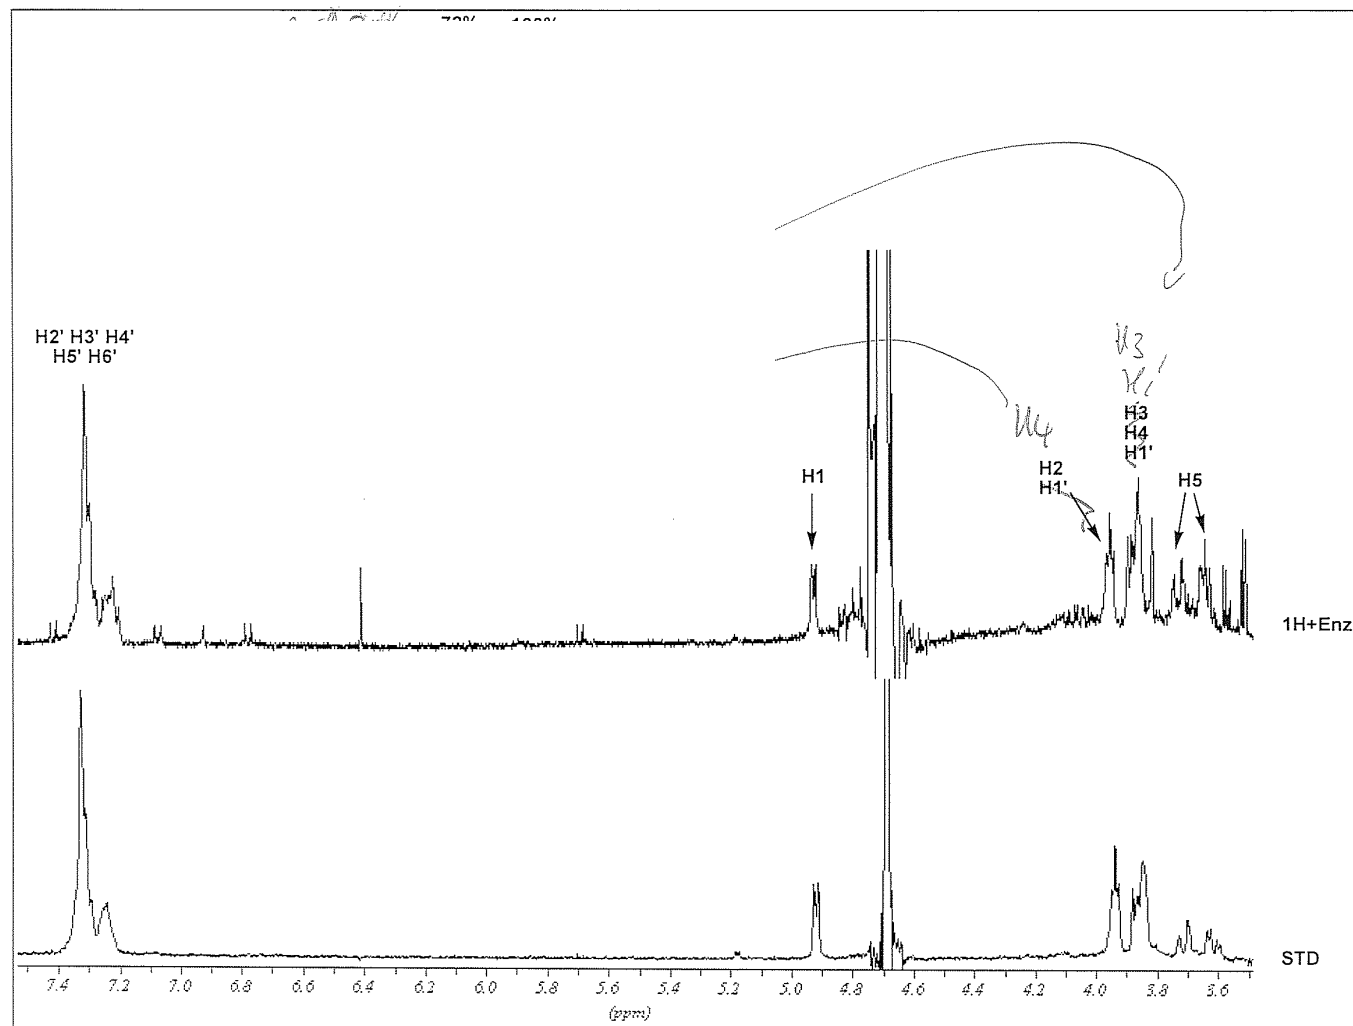

Supplement: c1ob06227a.pdf [file c1ob06227a.pdf]
